# Supplementary material for: Biomass Burning and Gas Flares Create the Extreme West African Aerosol Plume Which Perturbs the Hadley Circulation and Thereby Changes Europe’s Winter Climate
Source: Preprints.org preprint supplement (doi:10.20944/preprints202108.0554.v1), 2021-08-31
Supplement: Supplementary file 1 [file supplementary]

How the extreme West African Aerosol Plume changes Europe’s Winter Climate

Supplementary Information

1. APPENDIX A: THE EIGHT CONTINENTAL SCALE AEROSOL PLUMES

The locations of the eight continental scale aerosol plumes are shown in Figures A1 and A2. The average monthly MERRA-2 AOD level (1980 to 2020) of each plume is shown in Figure A3. Four plumes peak in the boreal summer, one in the boreal winter, two in September and one in August. The major sources of the plumes are shown in Table A1.

All plumes create local climate change when they exist, some cause regional change and at least one causes global change. This paper addresses the changes driven by the West African Plume in Europe.


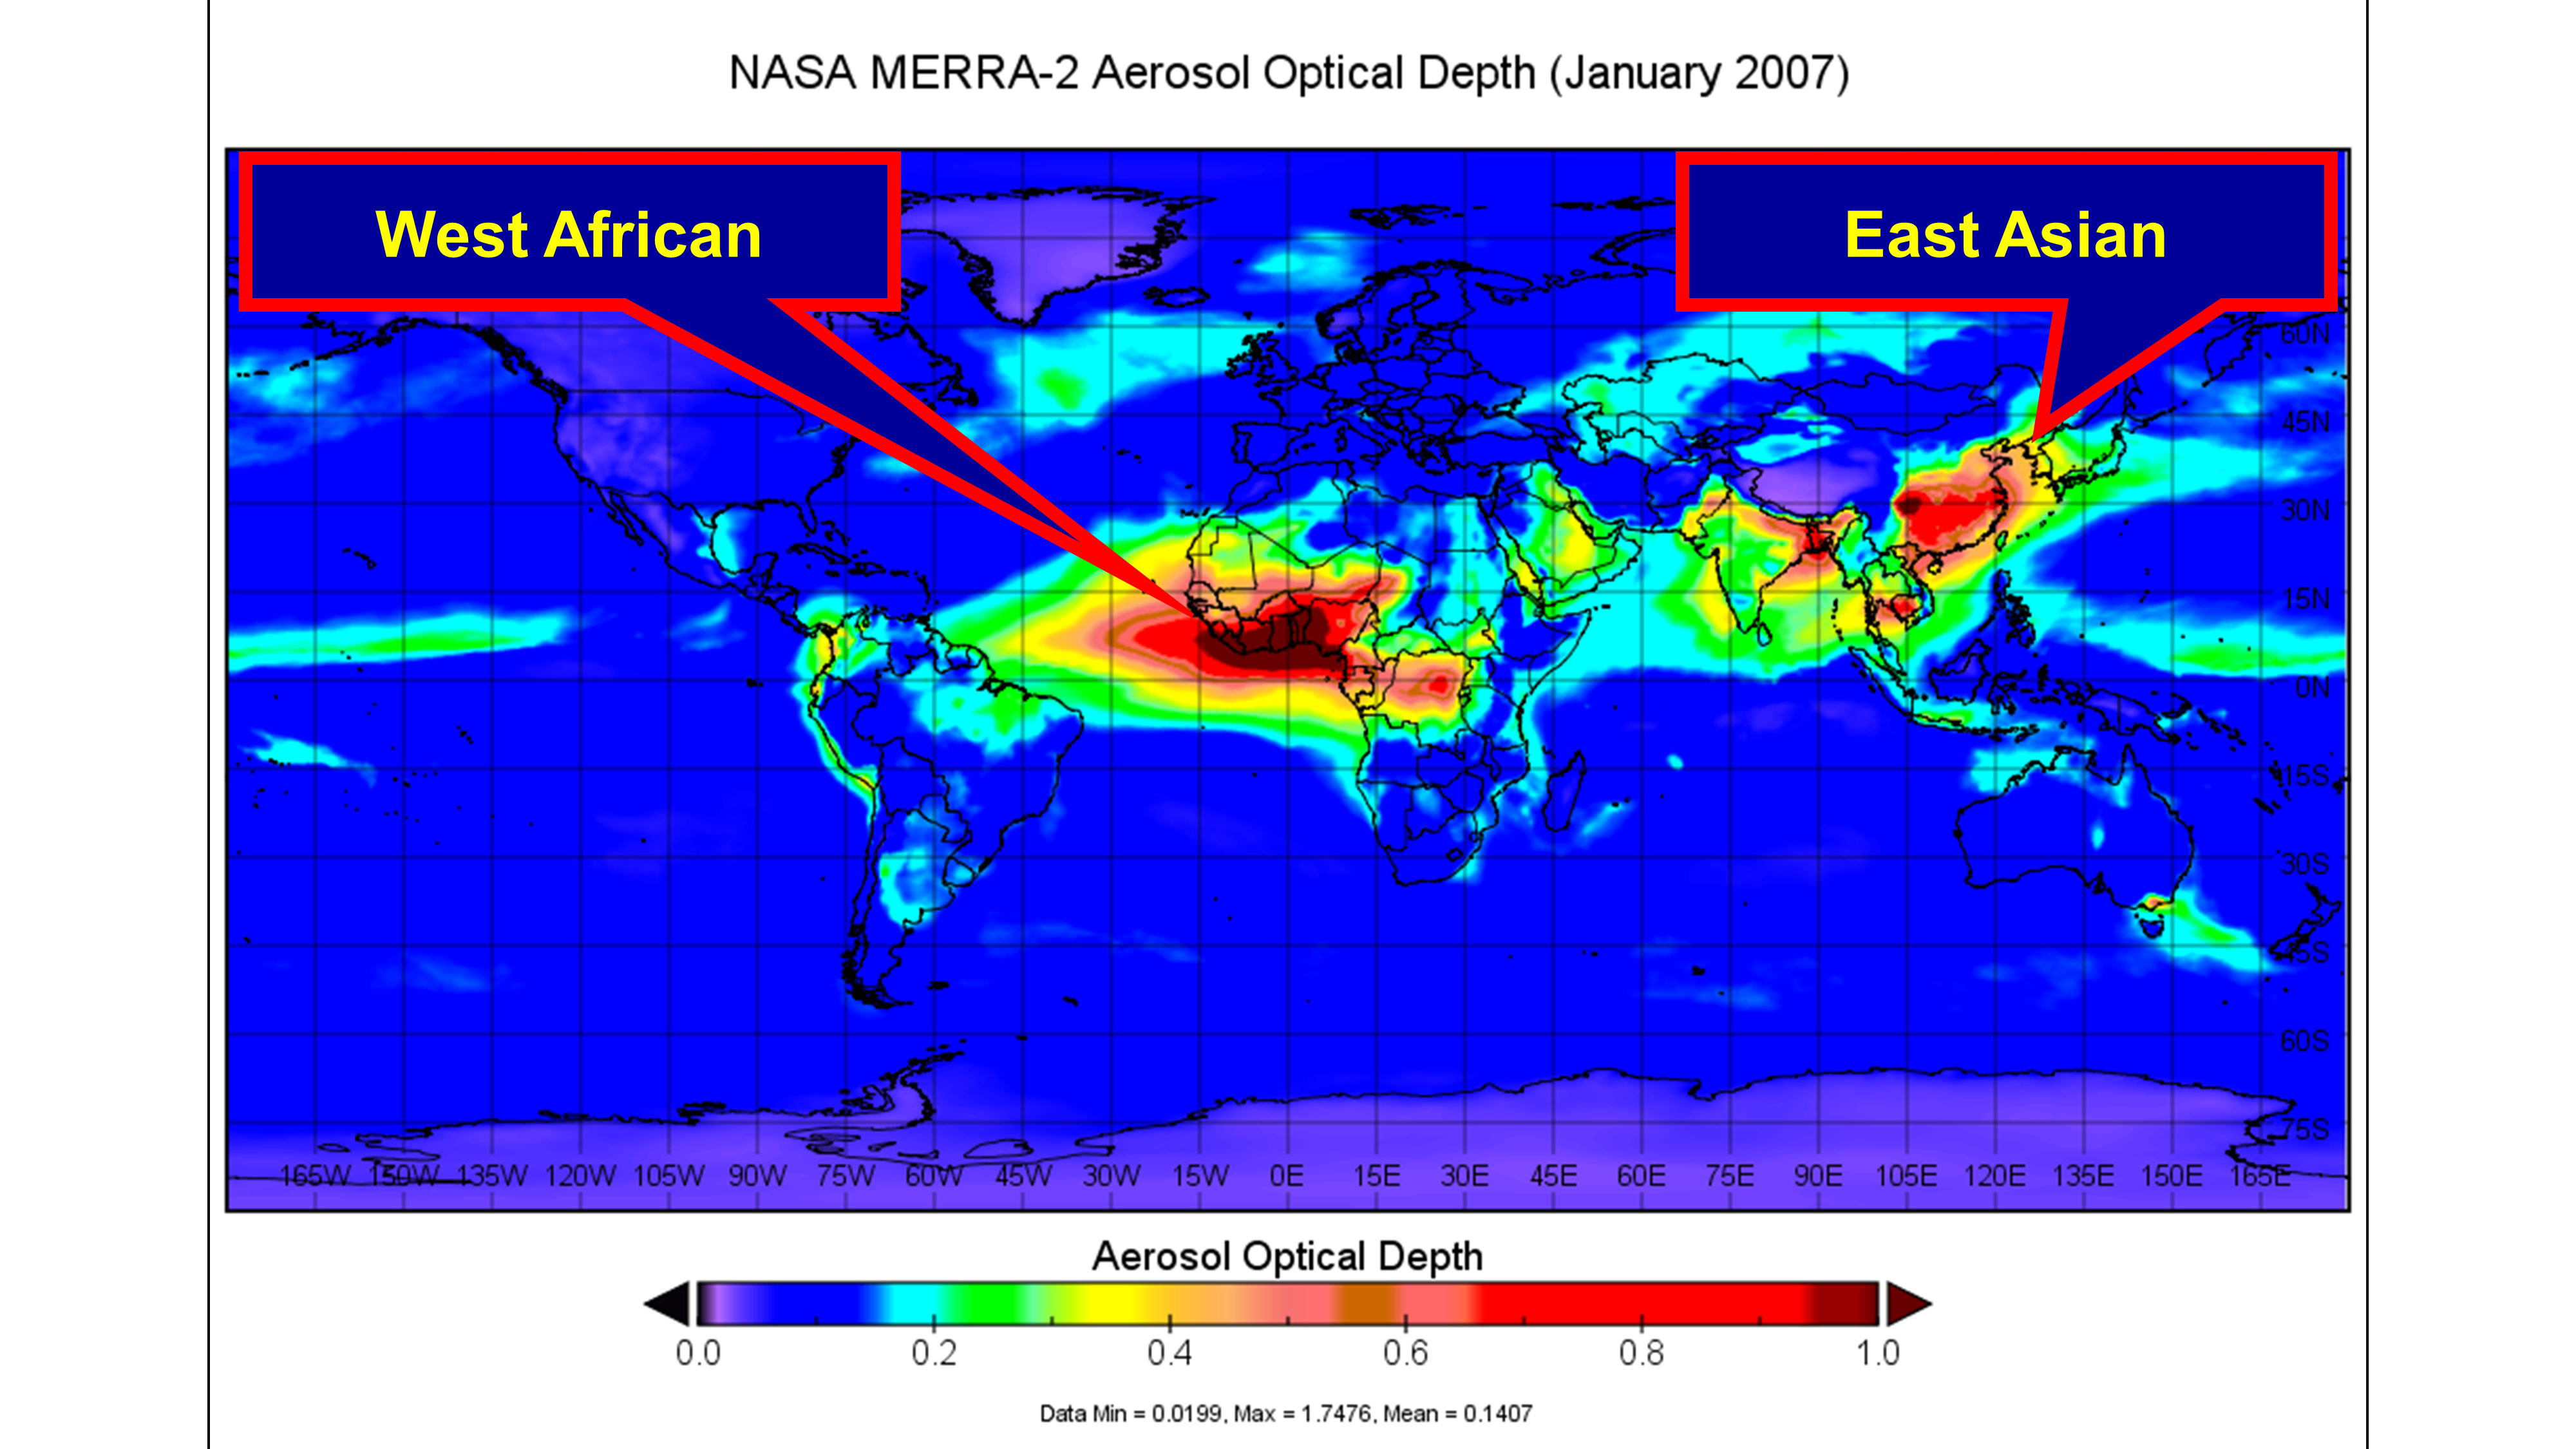


**Figure A1**. MERRA-2 AOD Jan 2007 showing two of the eight plumes.


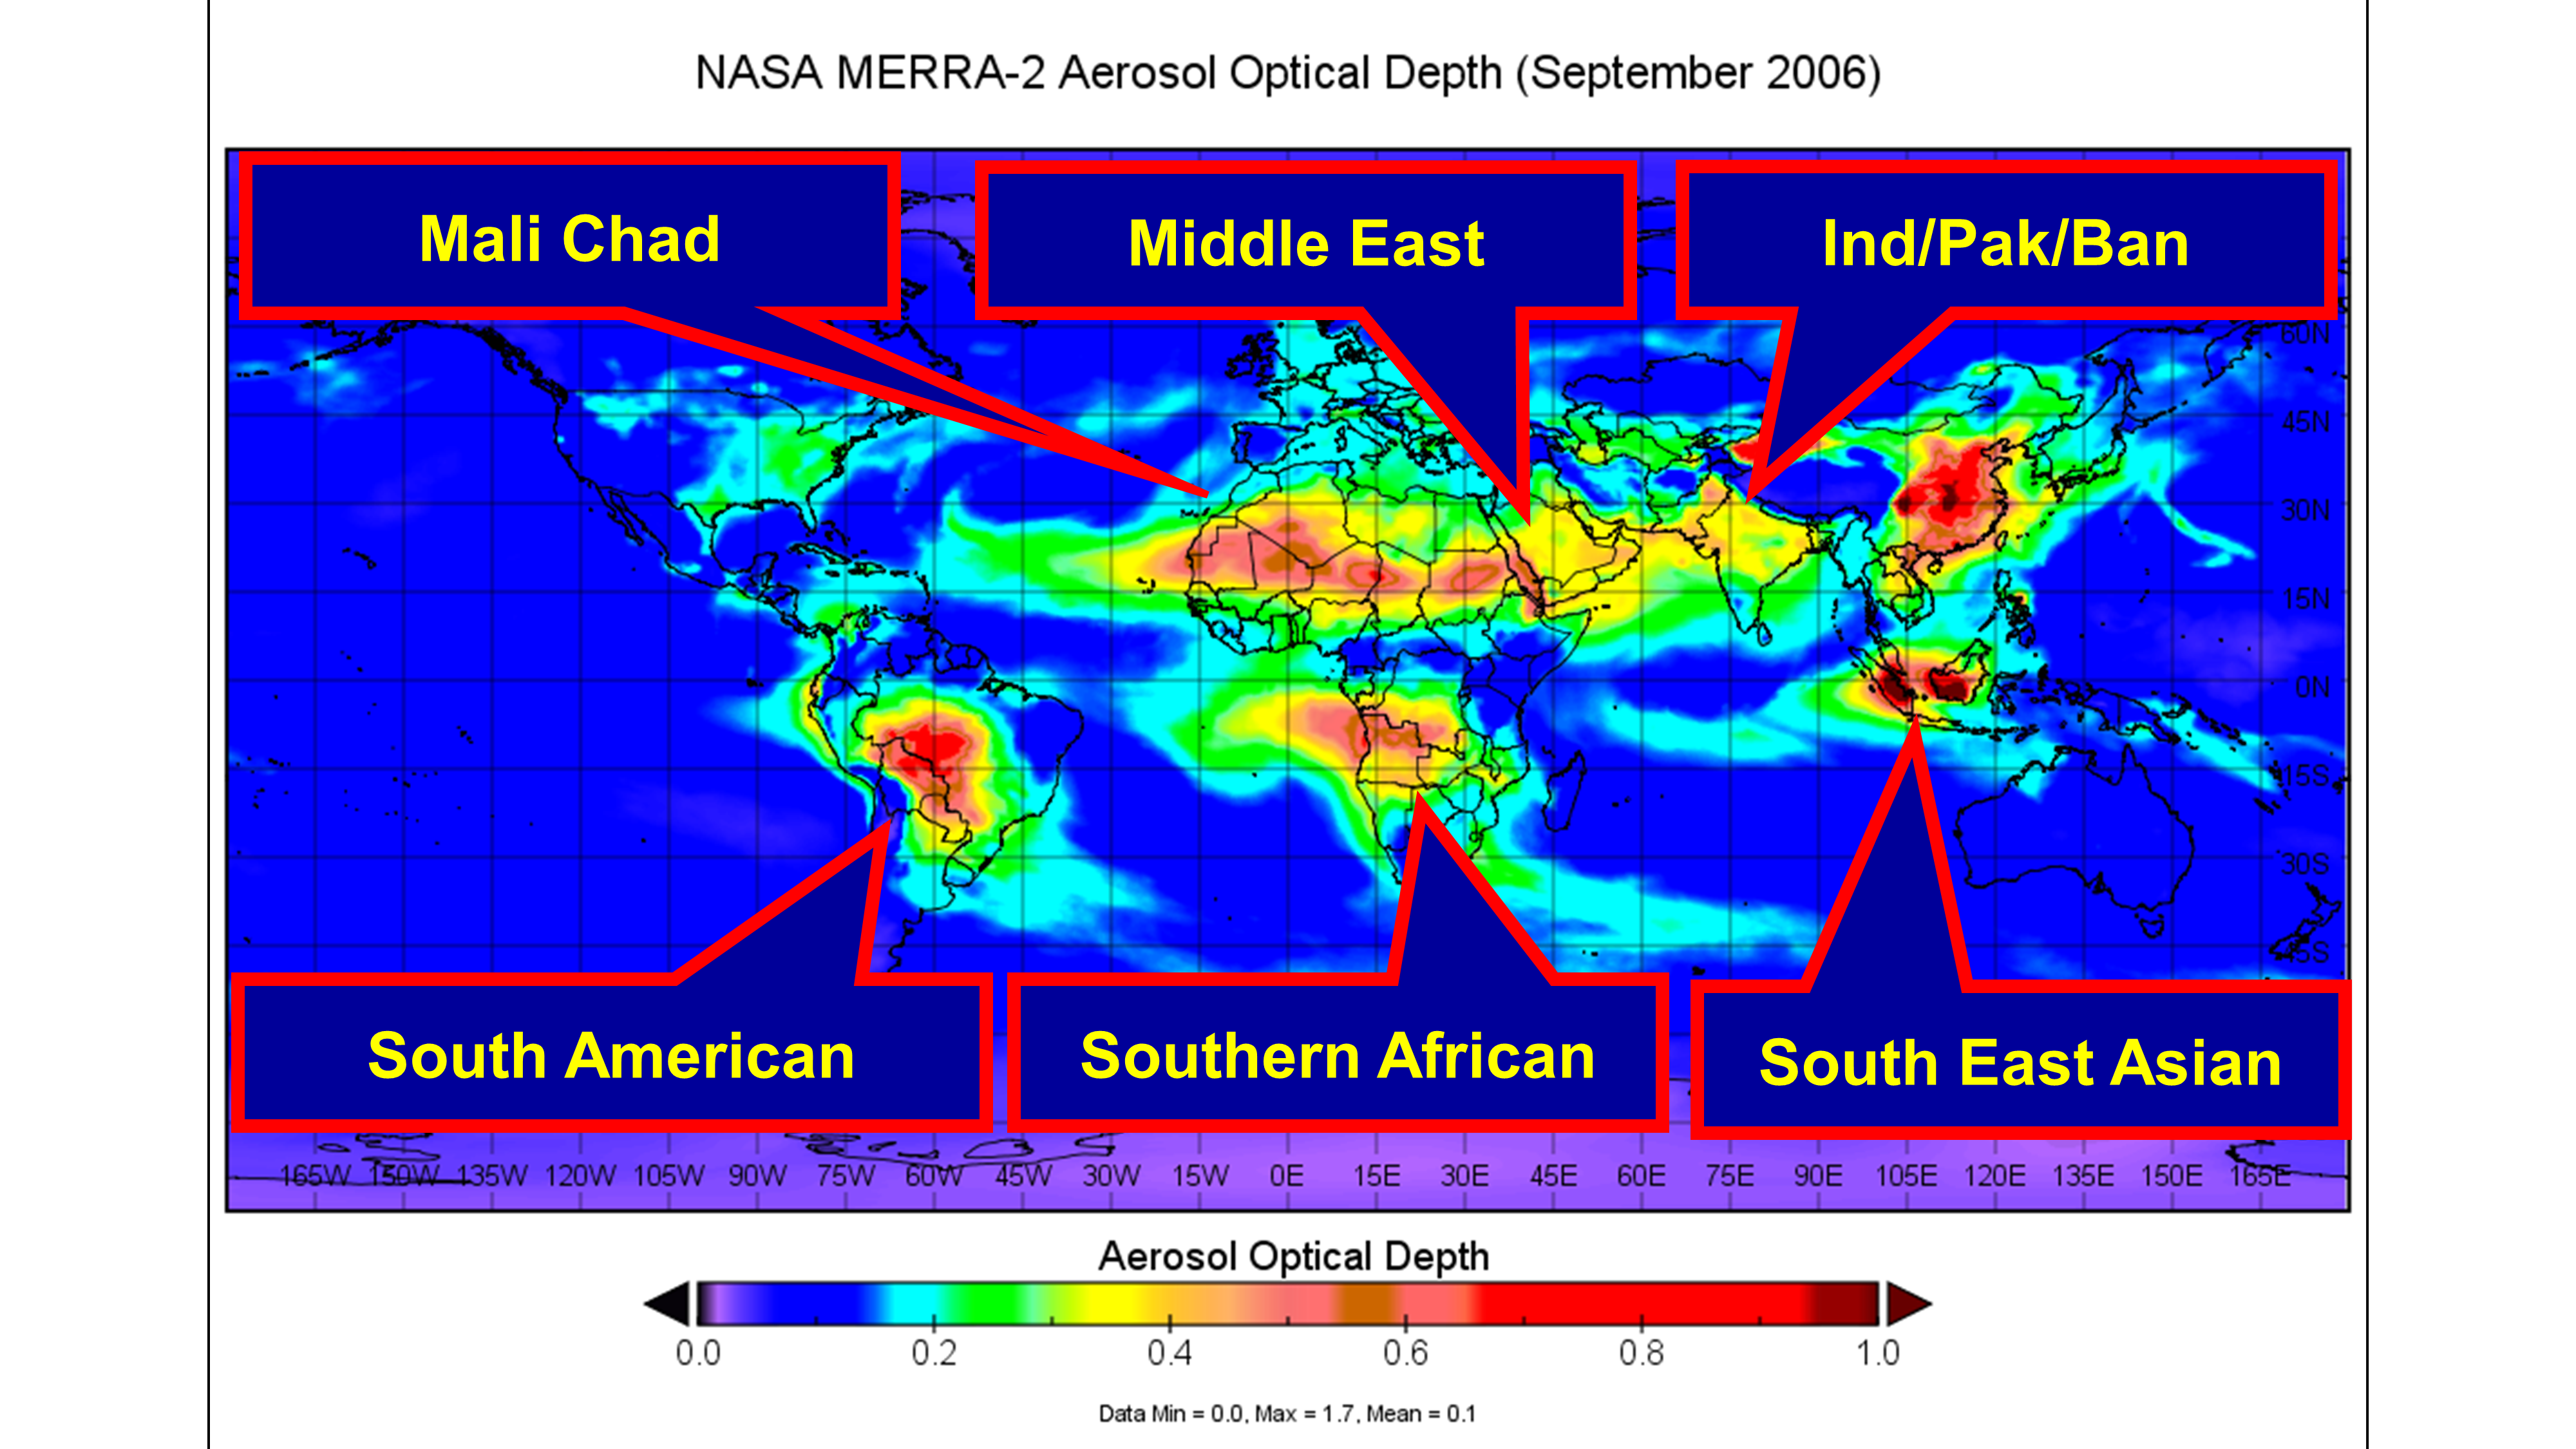


**Figure A2**. MERRA-2 AOD September 2006 showing six of the eight plumes.

**Figure A3**. Average monthly MERRA-2 AOD of the eight plumes.

| **Plume** | **Anthropogenic Source** | **Natural Source** |
| --- | --- | --- |
| South American | Biomass | Volcanoes |
| West African | Biomass | Gas Flares, Dust |
| Mali/Chad |  | Dust |
| Middle East | Gas Flares | Dust, Volcanoes |
| Southern African | Biomass | Volcanoes |
| India/Pakistan/Bangladesh | Biomass | Dust |
| South East Asian | Biomass, Gas Flares | Volcanoes |
| East Asian | Industry, Biomass | Dust |

Table AI: The aerosol sources of the eight continental scale aerosol plumes.

1. APPENDIX B: SOURCES OF THE WEST AFRICAN AEROSOL PLUME

The major sources of aerosols in West Africa are biomass burning and gas flares in the oil production industry. Dust from the Bodélé Depression and wider Sahel may be a minor source from January to March (JFM) and volcanoes are not.

- 1. Biomass Burning

Biomass burning in West Africa is a large direct source of carbonaceous aerosols and is part of the traditional annual agricultural cycle. It occurs during the dry season before the start of the local monsoon in April. The level of biomass burning in the region has increased significantly in recent decades and is expected to continue to increase [1].

In the WAP Area the biomass burning aerosol plume is at its most intense in JFM as Figure 2 shows. The increase in biomass burning in the WAP Area in recent decades has been driven by the increasing population of the WAP Area. The population of West Africa increased from 71 to 307 million between 1950 and 2010 and is expected to increase to 796 million by 2050. This is an elevenfold increase in 100 years ([United Nations](https://www.un.org/en/development/desa/population/publications/database/index.asp)). This increasing population has forced: an increase in food production from tropical agriculture with its attendant smoke/aerosols; and increased rainforest clearing to provide living space and agricultural land.

- - 1. Forest Clearing

A major source of aerosols in West Africa is forest clearing in Nigeria, the country at the centre of the WAP. Data from The [Global Forest Watch](https://www.globalforestwatch.org/) at [2] in Figure A4 shows the annual forest loss which has trended from under 50,000 Ha in 2001 to 250,000 in 2018, a fivefold increase.

**Figure A4**. Annual Forest Loss in Nigeria.

- - 1. NASA Fire Data

The archived [active fires](https://earthdata.nasa.gov/earth-observation-data/near-real-time/firms/active-fire-data) from Feb 2012 to Feb 2020 from NASA was downloaded for the area 5° to 15°N 0° to 10°E. Over 3.8 million observations for this area are included in the database. The data was summed for each day and the daily total then averaged for each month to avoid double counting fires which are recognized on more than one day. The fire data and MERRA-2 AOD are plotted in Figure A5 to show the close connection between fire and AOD in West Africa which is also shown in the high correlation (0.77 significance <0.01) between the AOD and fire numbers in this period.


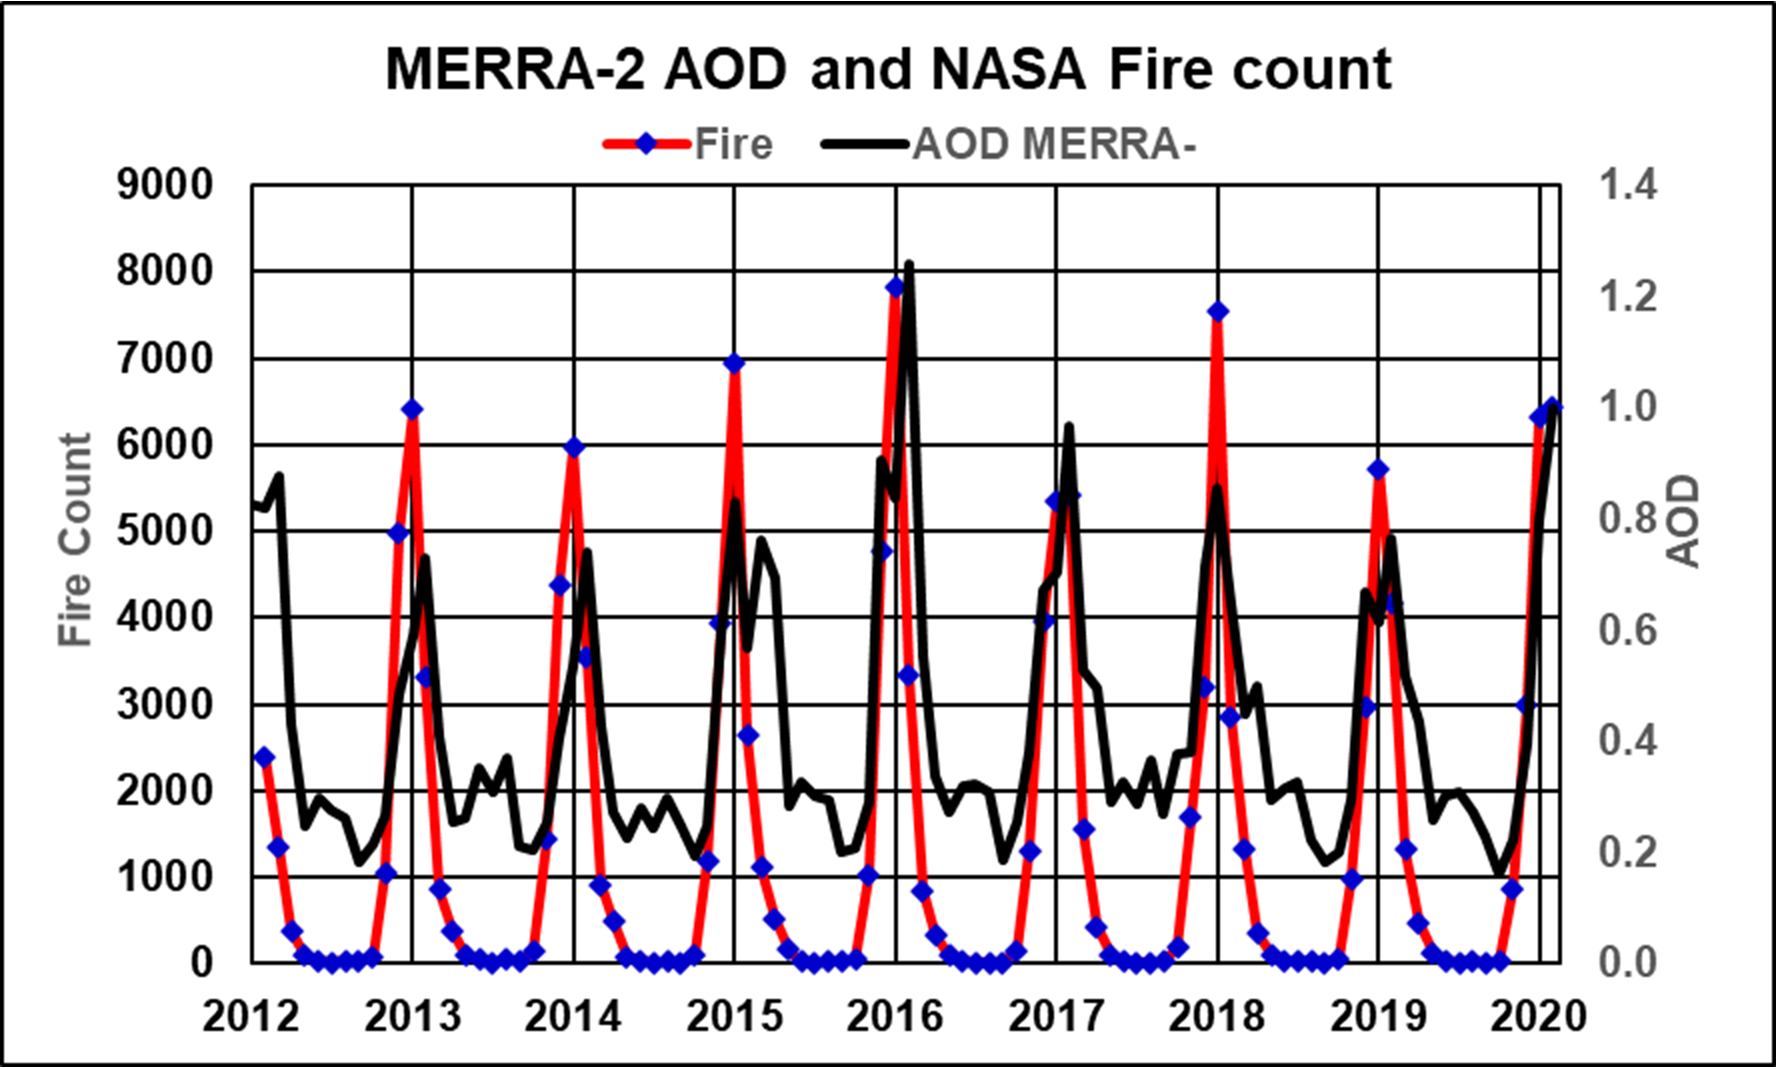


**Figure A5.** West African Archived Fires (NASA) and NASA MERRA-2 WAP Area AOD.

- - 1. Literature - African Fires

A “large amount of carbonaceous aerosols are emitted by biomass burning” in West Africa south of 20º N [3]. The fires which raged in the sub-Saharan belt of Africa on January 30th 2016 are shown in Figure 1 in [4]. The WAP Area incorporates the most concentrated level of detected fires in the region which stretches from Sierra Leone to South Sudan.

In Africa “Fires are mostly human ignited” [5].

Biomass burning and dust are the dominant aerosol sources in the months before the West African monsoon [6].

Wildfires in Africa contribute 57% of the biomass burning emissions of the continent and “Almost all are human-ignited” [7]. The remainder, 36% for domestic and industrial activities and 3% each for crop residue burning and deforestation, are all anthropogenic sources. This obviously implies that nearly all the biomass burning in Africa is anthropogenic.

- 1. Gas Flares

The oil industry flares associated gas (gas dissolved in liquid oil which boils out of the liquid when the oil is produced from deep in the Earth and the pressure reduces to atmospheric levels) when no infrastructure exists to use the gas. The use of gas flares increased over recent decades as oil production in West Africa increased from 274,000 to 2,342,000 barrels of oil per day between 1965 and 2018 (BP Statistical Review of World Energy 2019) with the majority of the increase occurring before 1974. Nigeria is the major producer in the region with 88% of the total oil production in West Africa in 2018.

Three hundred gas flares exist in Nigeria flaring 15 billion m3 [6] and the World Bank has established the Global Gas Flaring Reduction Partnership (GGFRP) which estimates Nigeria flares 7.4 billion m3 of natural gas each year and the gas flare locations are shown in Figure 1. NOAA identified 359 flare locations in West Africa from Congo to Mauretania with Nigeria hosting the majority at 203. Images of such flares producing aerosols are easily found e.g. Figure A6 from NOAA or at the GGFRP web site.


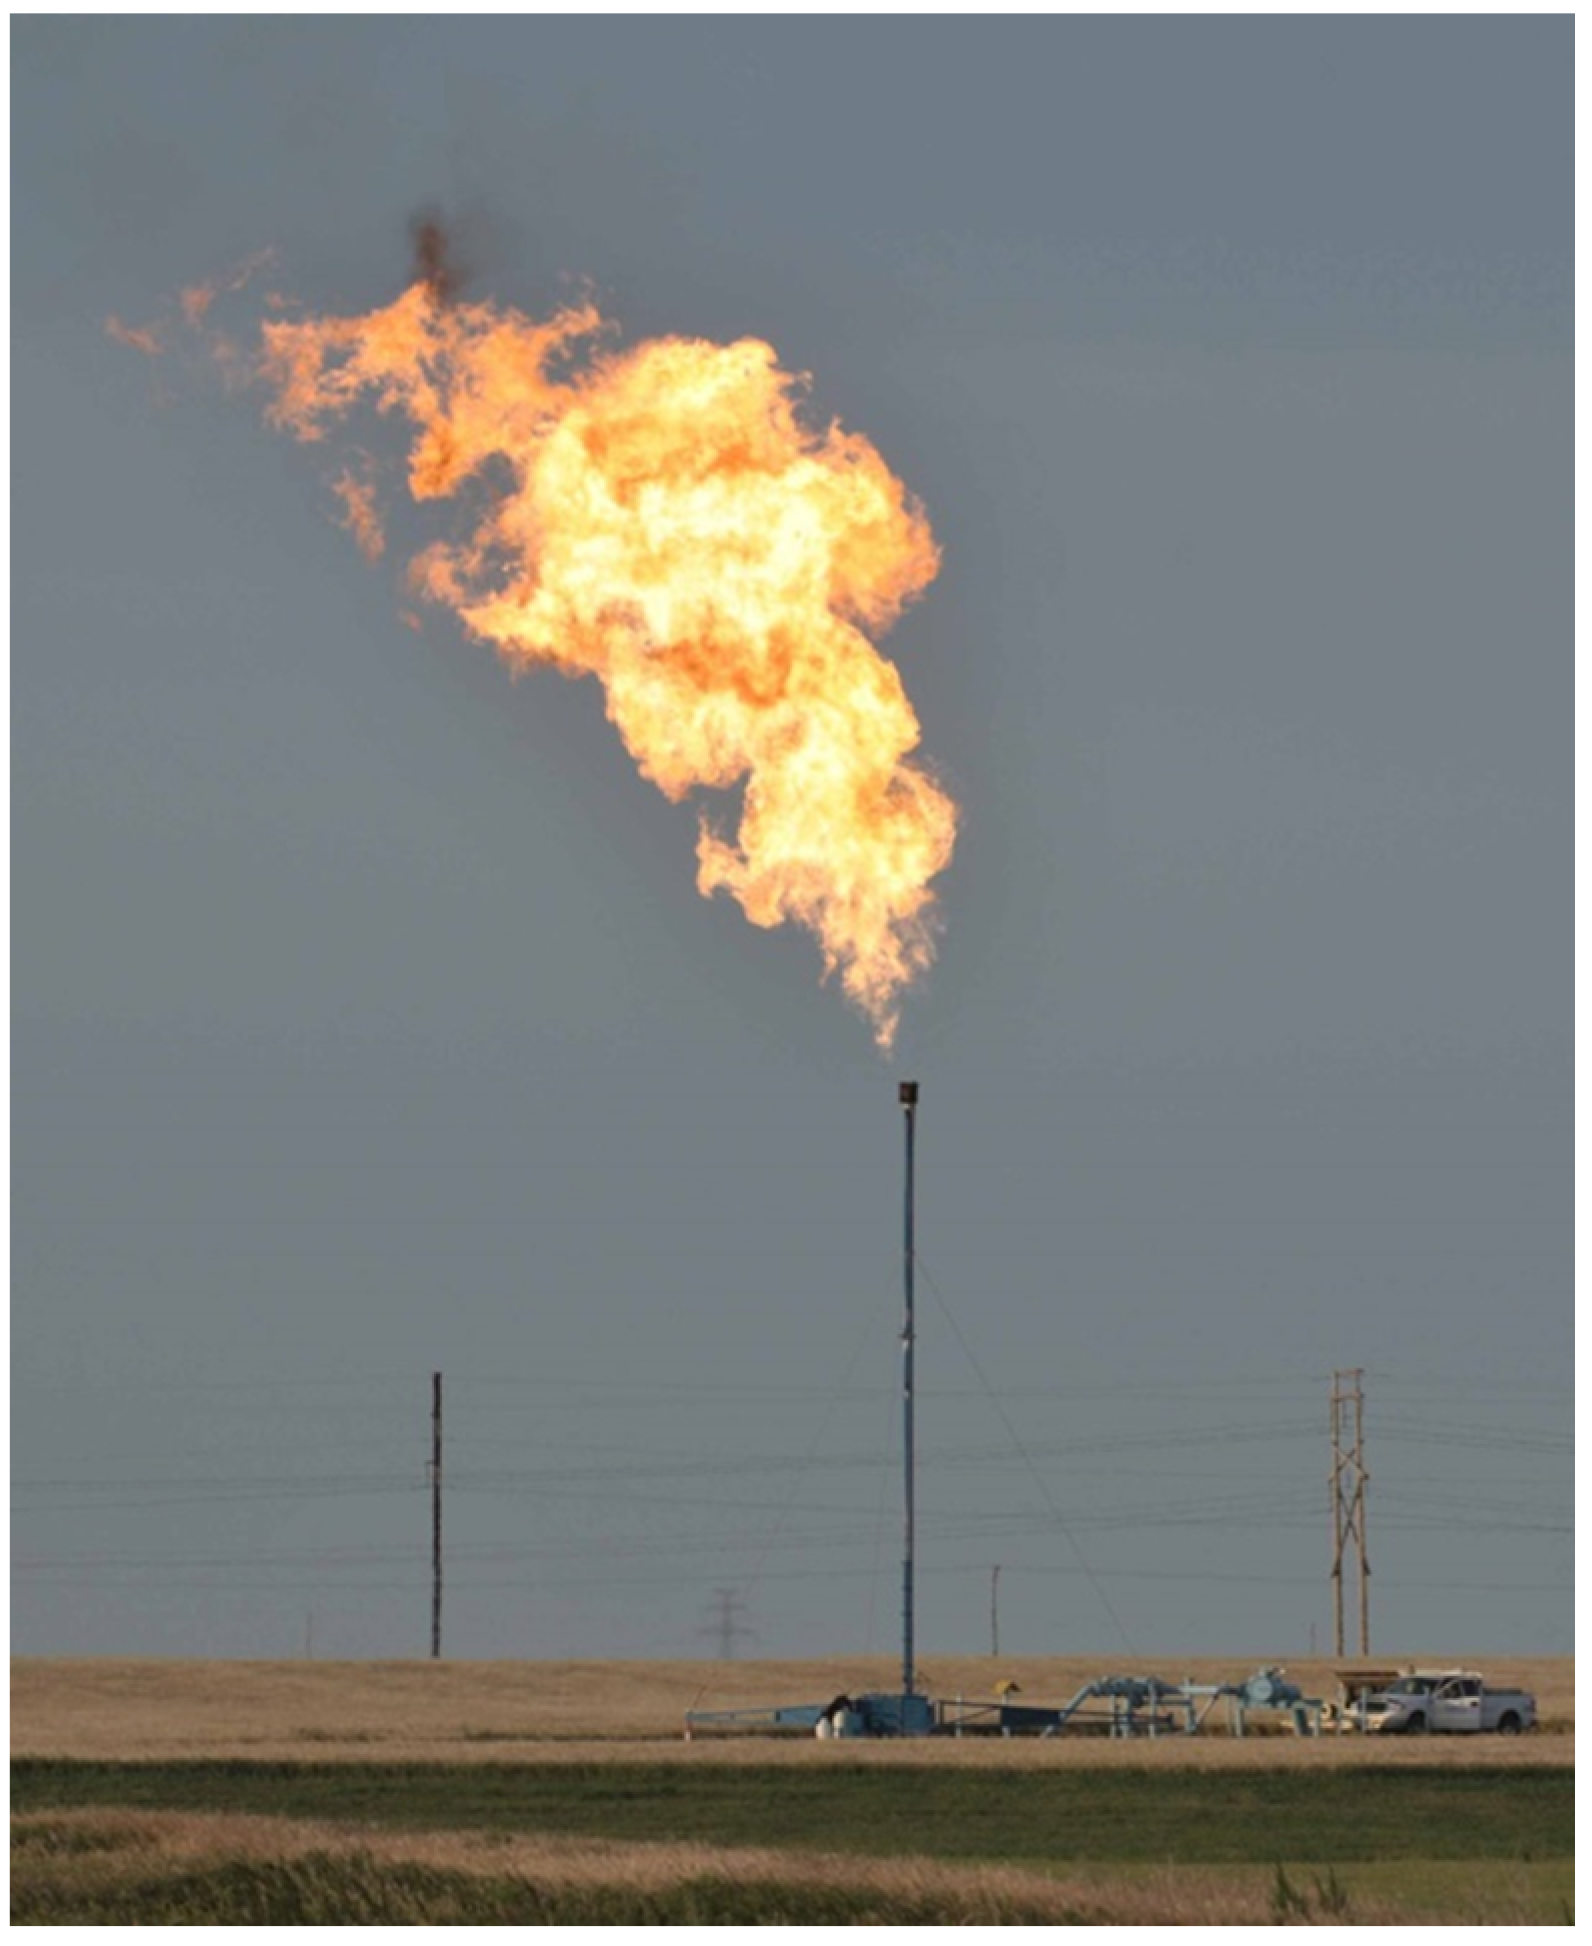


**Figure A6**. Gas Flare NOAA at <https://ngdc.noaa.gov/eog/viirs/download_global_flare.html>.

- 1. Dust from the Bodélé Depression

The Bodélé Depression is recognised as one of, if not the, major source of dust in the world. It is located at 18º E and 17º N to the north east of the WAP Area. Figure 4 showing the MERRA-2 AOD for Jan to March 2004 clearly shows that the main centre of the WAP with the highest AOD is over southern Nigeria where Figure 1 shows nearly all the gas flares in the region exist and Figure 1 in [4] shows the greatest concentration of biomass burning fires occur.

Further, whilst the MERRA_2 AOD in Figure 4 clearly shows the Bodélé Depression producing an aerosol plume, the AOD of the plume is about 0.50 close to the Bodélé Depression which, although still a significant level, is less than half the AOD over southern Nigeria at 1.2

- 1. Volcanoes

The Global Volcanism Program (GVP) database of volcanic eruptions [8] shows that the WAP Area hosts several volcanoes with only one, Mount Cameroon, recently active with an estimated 4 months of activity in JFM since 1950 with volcanic explosivity indices of 2. As this is unlikely to have any significant impact on the effects discussed in this paper an analysis of volcanic activity has not been included.

**Note**: this section on volcanoes is included for completeness as in some regions volcanic activity is a major source of aerosols and a negative finding should be reported.

- 1. Conclusions

1. The measured aerosol data clearly shows the most intense centre of the WAP is coincident with the main centre of biomass burning and gas flares in the region.
2. The literature clearly states that biomass burning fires are anthropogenic
3. The data cited above clearly linked fires in Nigeria to forest loss which is indubitably anthropogenic.
4. Oil industry gas flares are anthropogenic and a significant source of aerosols.
5. Volcanoes are not a significant source of aerosols in the WAP.

It is indisputable that biomass burning in Africa and therefore in West Africa is anthropogenic and is the major source of the WAP aerosols with gas flares being a secondary source in JFM and I conclude that the extreme JFM WAP is anthropogenic.

1. APPENDIX C: AEROSOLS AND CLIMATE

The IPCC Assessment Report 4 (AR4) [9] identifies the two main anthropogenic contributors to climate change as Long-Lived Green House Gases (LLGHG) and aerosols and defines Radiative Forcing (RF) as the global annual average of “the change in the net, downward minus upward, irradiance (expressed in W m–2) at the tropopause”. The IPCC AR4 also discusses Surface Forcing (SF), the effects of the forcing agents at the surface of the Earth and Figure A7 from that report shows the evolution of RF and SF from 1850 to the present day. It can be clearly seen that the net anthropogenic RF effect, black line – panel (A), follows the red line of LLGHG reasonably closely. However, the net anthropogenic SF effect, black line – panel (B), clearly follows the evolution of the aerosol direct effect which is much larger than the aerosol direct RF effect. The SF graph also shows that the anthropogenic, globally and annually averaged aerosol direct effect in 2000 at -1.6W/m2 is comparable to the explosive volcanic eruptions of Krakatau (1883) -2.2W/m2 and Pinatubo (1991) -1.8W/m2 which are considered to have affected the mid to high latitude atmospheric circulation patterns [9].


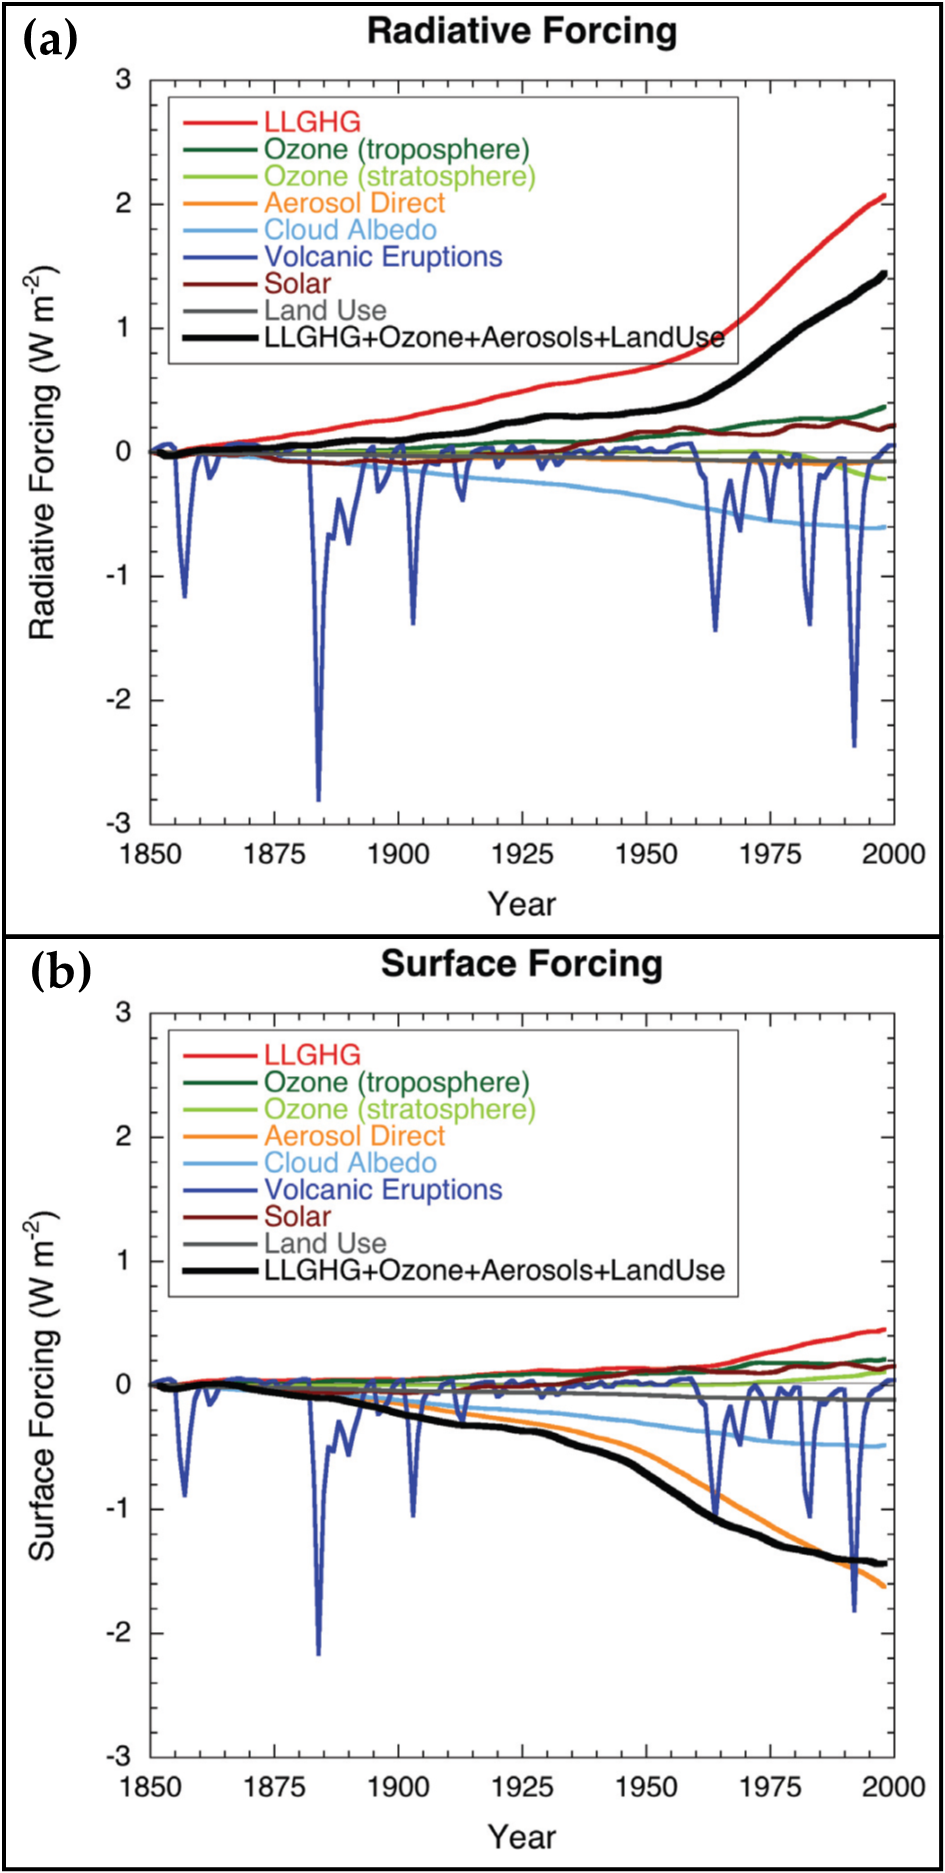


**Figure A7**. IPCC AR4 Figure 2.23 Chapter 2 page 208 [10]. (a) Globally and annually averaged temporal evolution of the instantaneous all-sky RF; (b) SF due to various agents, as simulated in the MIROC+SPRINTARS model (Nozawa et al., 2005; Takemura et al., 2005). This is an illustrative example of the forcings as implemented and computed in one of the climate models participating in the AR4. Note that there could be differences in the RFs among models. Most models simulate roughly similar evolution of the LLGHGs’ RF.

Absorbing aerosols, particularly black carbon, a product of incomplete combustion [11], and organic carbon [12], have been linked to variations in the vertical temperature profile of the atmosphere and the large scale atmospheric circulation [9] [13] [14] [15]. Aerosols may also have a greater influence on the hydrologic cycle than other forcing agents through their SF effects [9].

Discussing the effects of aerosols on the West African monsoon it was reported that “In West Africa, biomass burning is a large direct source of car­bonaceous aerosols” and “Biomass burning occurs predominantly dur­ing the dry season. It is almost exclusively anthropogenic…”. It was also noted that “more attention should be paid to rapidly increasing air pollution over the explosively growing cities of West Africa, as experiences from other regions suggest that this can alter regional climate through the influences of aerosols on clouds and radiation” [1].

Concerns were expressed that the distribution and evolution of aerosol emissions during the 20th century were not well understood [9] and most studies used in the IPCC AR4 omitted carbonaceous aerosols which could have significant effects at regional scales [16] .

The effects of short lived gases and aerosols were found to be substantial compared to LLGHG and to account for as much as 40% of the warming over the summertime United States and the climate response to these forcing agents was not confined to the area of their emission [17].

The global aerosol coverage and forcing is highly variable geographically and temporally and it is “insufficient or even misleading” to emphasise the global average and the aerosol SF is greater than the RF at the top of the atmosphere. Such SF affects the atmospheric circulation and the hydrologic cycle [18].

Investigating the climate of China and India, precipitation and temperature changes were found in the model that were comparable to those observed only if the aerosol ensemble included a large proportion of absorbing black carbon ("soot") which was similar to observed amounts and noted that absorbing aerosols heat the atmosphere and alter the regional atmospheric stability and vertical motions which affects the large-scale circulation and hydrologic cycle with significant regional climate effects [13].

Anthropogenic aerosols have been linked to: the decadal variance in the North Atlantic SST and thus to drought in the Sahel and the Amazon with the dominant mechanism being the reduction in short wave surface radiation [19]; and the expansion of the tropics in the northern hemisphere evidenced by a poleward shift of the Hadley Cells, subtropical dry zones and extra-tropical storm tracks, and West Africa is identified as one of the regions of the globe demonstrating trend increases in black carbon emissions of 1ng/Kg/year from 1970 to 2009 [20]. However [21] investigated the claims in [19] and concluded that “key aspects of the HadGEM2-ES simulation exhibit substantial discrepancies with observations.” Whilst noting that “Anthropogenic and natural aerosols have likely played some role in forcing the observed Atlantic mutidecadal variability.”

The extreme biomass burning episode in the south East Asia in 2006 caused increased temperatures over Indonesia during the period of burning. The largest increases were found in October and November between 150 and 400 hPa. In some regions, increases exceeded 0.7º K during SON.” and it was noted that GCMs should include realistic representations of aerosols which fully represent the interannual variability of biomass burning emissions [22].

The carbonaceous aerosol emission inventories for the Coupled Model Intercomparison Project phase 5 (CMIP5) are based on [23] and are decadal averages designed to investigate long term (decadal to century) climate change and the paper specifically states the emission inventories for CMIP5 are not designed to investigate “rapid” (i.e. less than a few years) pollution changes which this paper addresses.

Future emissions of anthropogenic aerosols are “directly addressable by government policy actions”. [19]

In summary then the literature states aerosols affect:

1. The hydrologic cycle;
2. The large-scale atmospheric circulation systems; and
3. are not well understood;

and that carbonaceous aerosols:

1. Are an essential parameter in climate models to correctly model observed changes in precipitation;
2. Were omitted from most studies used in the IPCC AR4;
3. Have recently been linked to significant climate events; and
4. Are only included in the CMIP 5 RCP’s as decadal averages which cannot model the effects this paper addresses.

and that aerosol emissions are directly addressable by government policy actions.

The term Aerosol Regional Dimming (ARD) describes the surface radiative forcing effect of continental scale aerosol plumes which immediately alters the large-scale atmospheric circulation systems and regional hydrologic cycle and, crucially, only occurs when the plume exists.

1. APPENDIX D: DATA SOURCES

NASA MERRA-2 <https://giovanni.gsfc.nasa.gov/giovanni/>

NASA Terra <https://giovanni.gsfc.nasa.gov/giovanni/>

NASA Fire Data <https://earthdata.nasa.gov/earth-observation-data/near-real-time/firms/active-fire-data> ;

NASA CALIPSO Data <https://eosweb.larc.nasa.gov/project/calipso/calipso_table> .

NCEP/NCAR Reanalysis https://psl.noaa.gov/cgi-bin/data/timeseries/timeseries1.pl

NOAA/ESRL images <http://www.esrl.noaa.gov/psd/> .

LME <https://www.earthsystemgrid.org/> and <https://www.earthsystemgrid.org/dataset/ucar.cgd.ccsm4.CESM_CAM5_LME.html>

The UK Met Office at <https://www.metoffice.gov.uk/weather/learn-about/past-uk-weather-events>

The IPCC Reports <https://www.ipcc.ch/reports/>

Google Earth <https://www.google.com/earth/>

Forest loss data <https://www.globalforestwatch.org/>

BP oil production data <https://www.bp.com/en/global/corporate/energy-economics/statistical-review-of-world-energy.html>

The GGFRP <https://www.worldbank.org/en/programs/gasflaringreduction> ;

The GVP <http://dx.doi.org/10.5479/si.GVP.VOTW4-2013> ;

UN Population Data <https://www.un.org/en/development/desa/population/publications/database/index.asp>

1. APPENDIX E: COMPARISON OF EFFECTS OF THE 2004 AND 1987 WAP

These plots are generated from the MERRA-2 and NCEP/NCAR datasets by subtracting the 1987 data from the 2004 data using NASA Panoply or the NCEP/NCAR website.


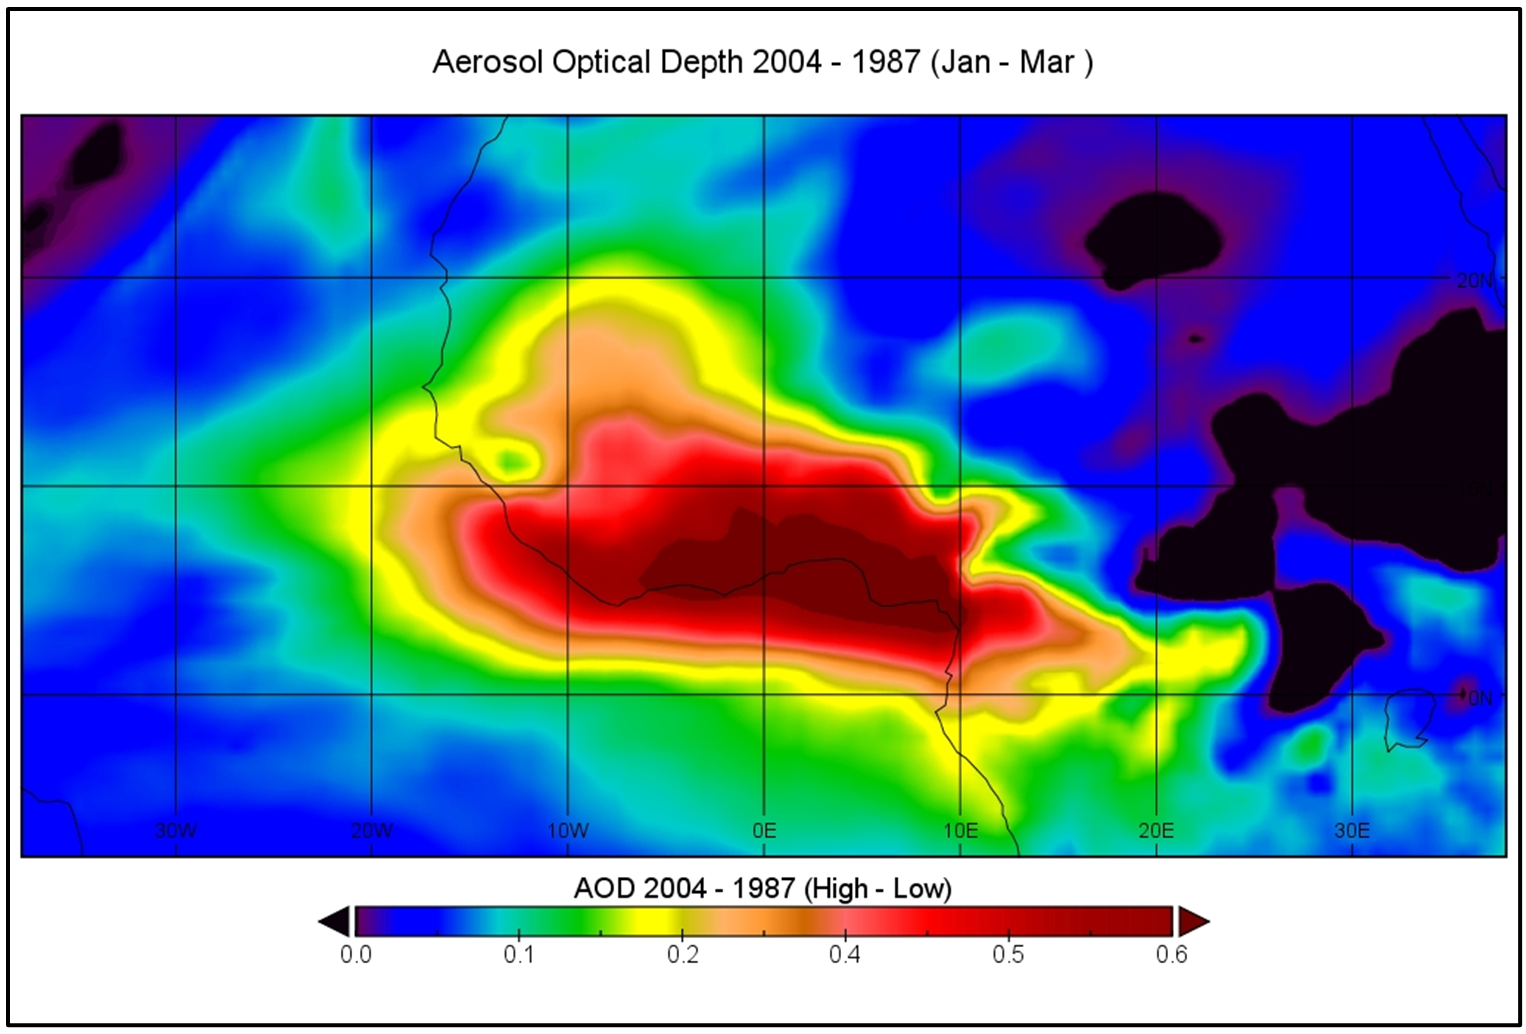


**Figure A8**. MERRA-2 JFM AOD 2004 minus1987


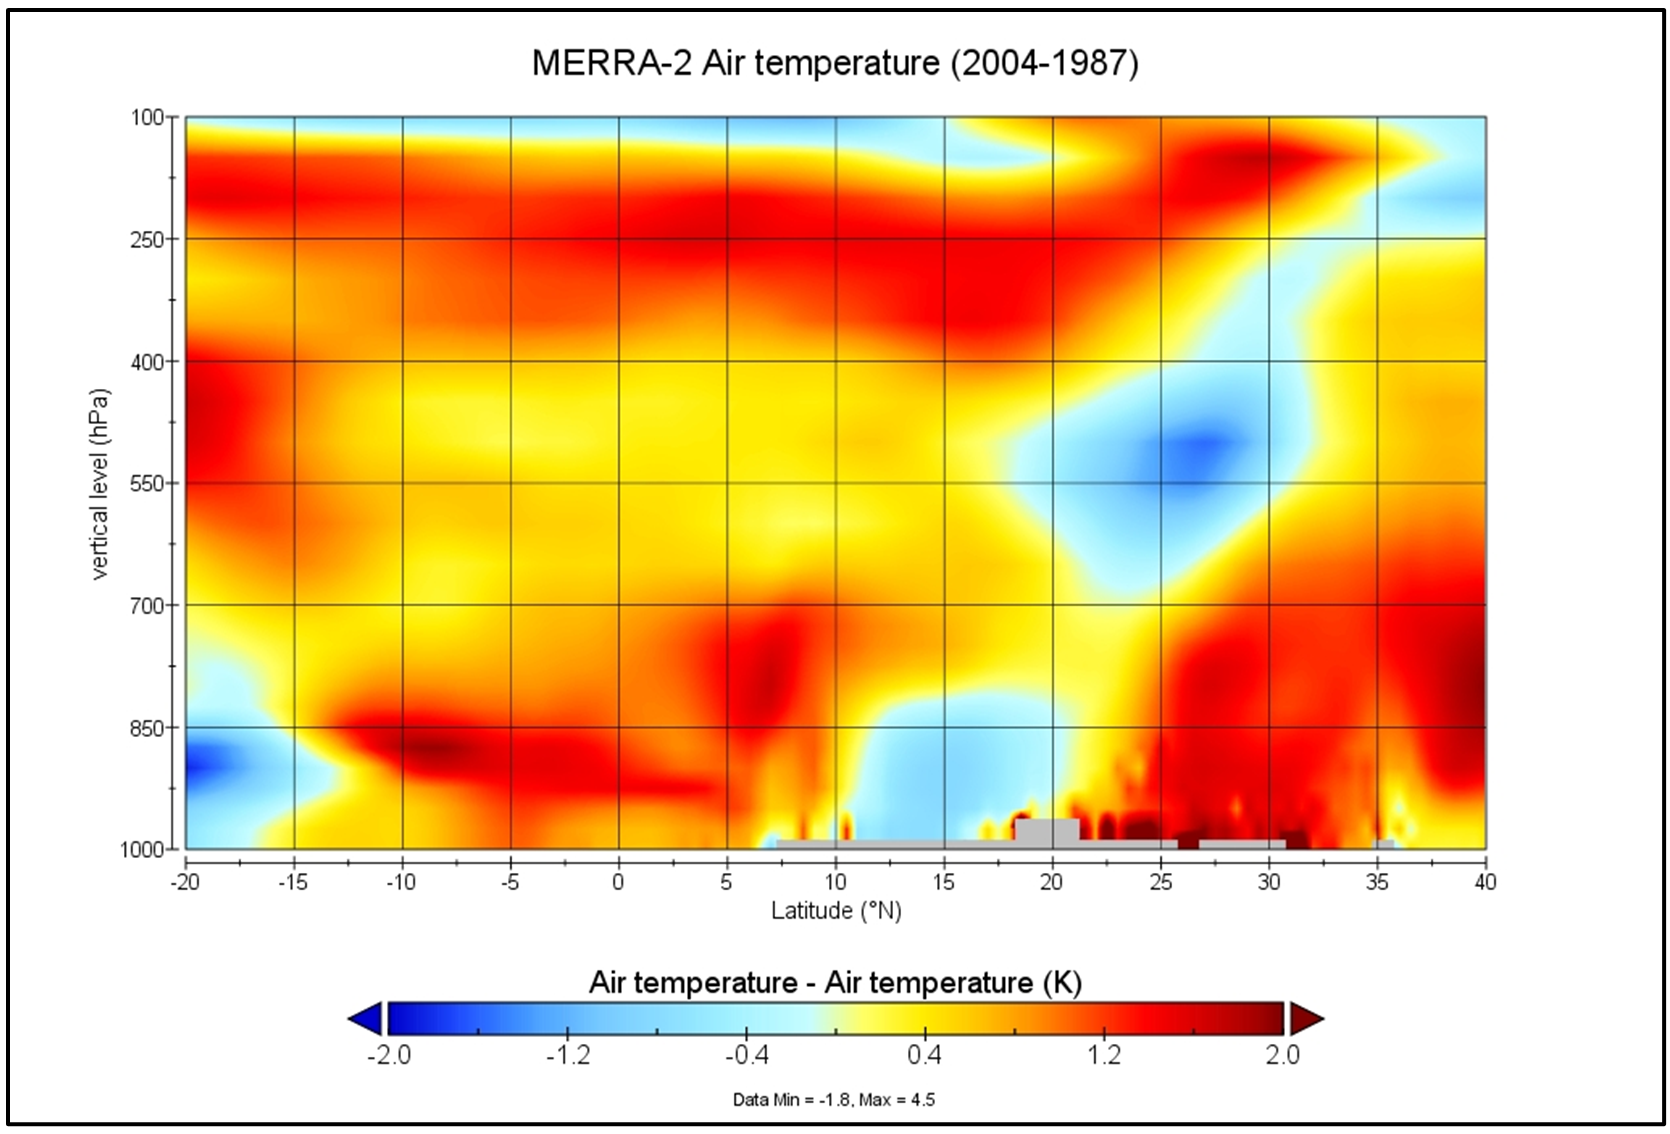


**Figure A9**. MERRA-2 JFM Air Temperature averaged across the WAP Area Longitudes. 2004 minus 1987


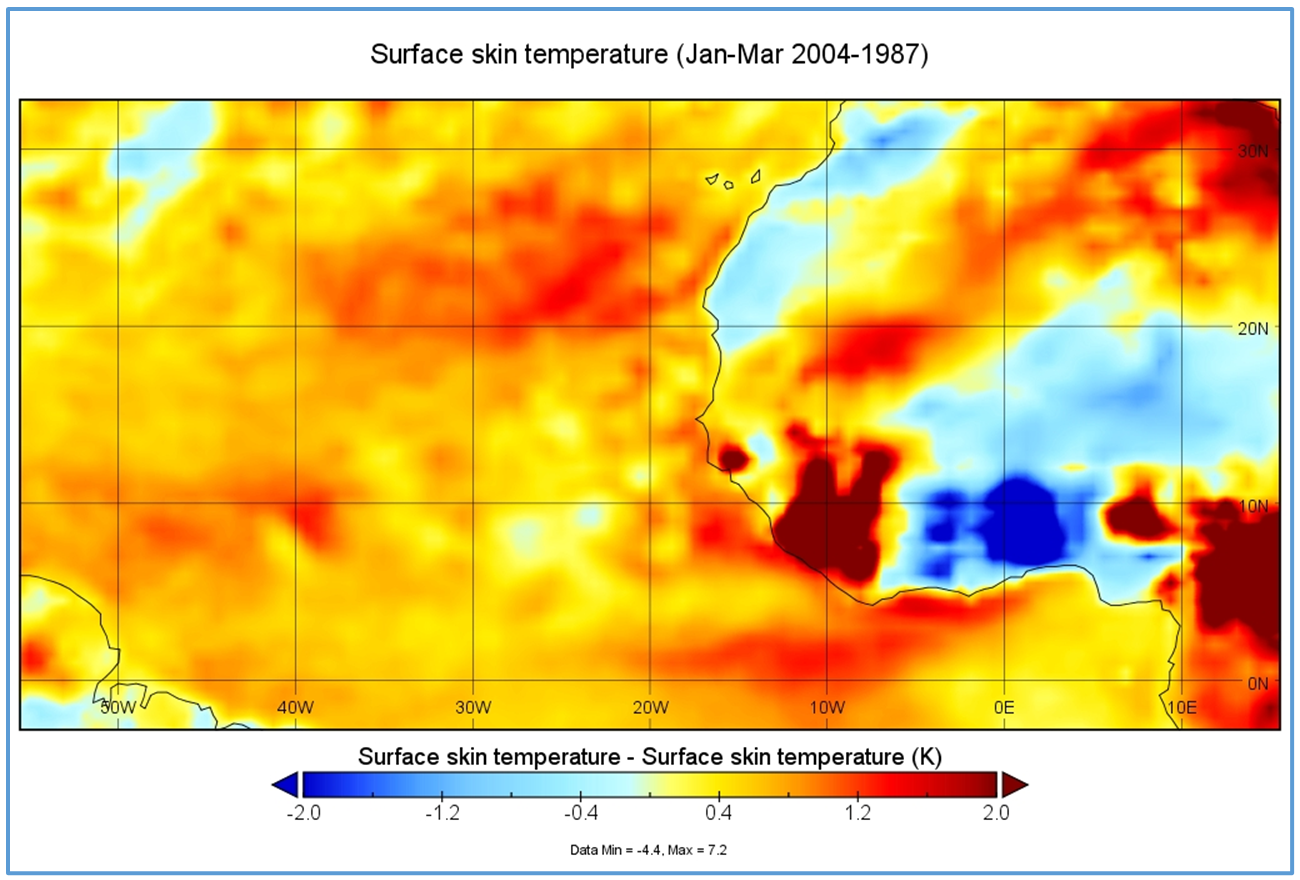


**Figure A10**. MERRA-2 JFM Surface Skin Temperature (TS) 2004 minus 1987


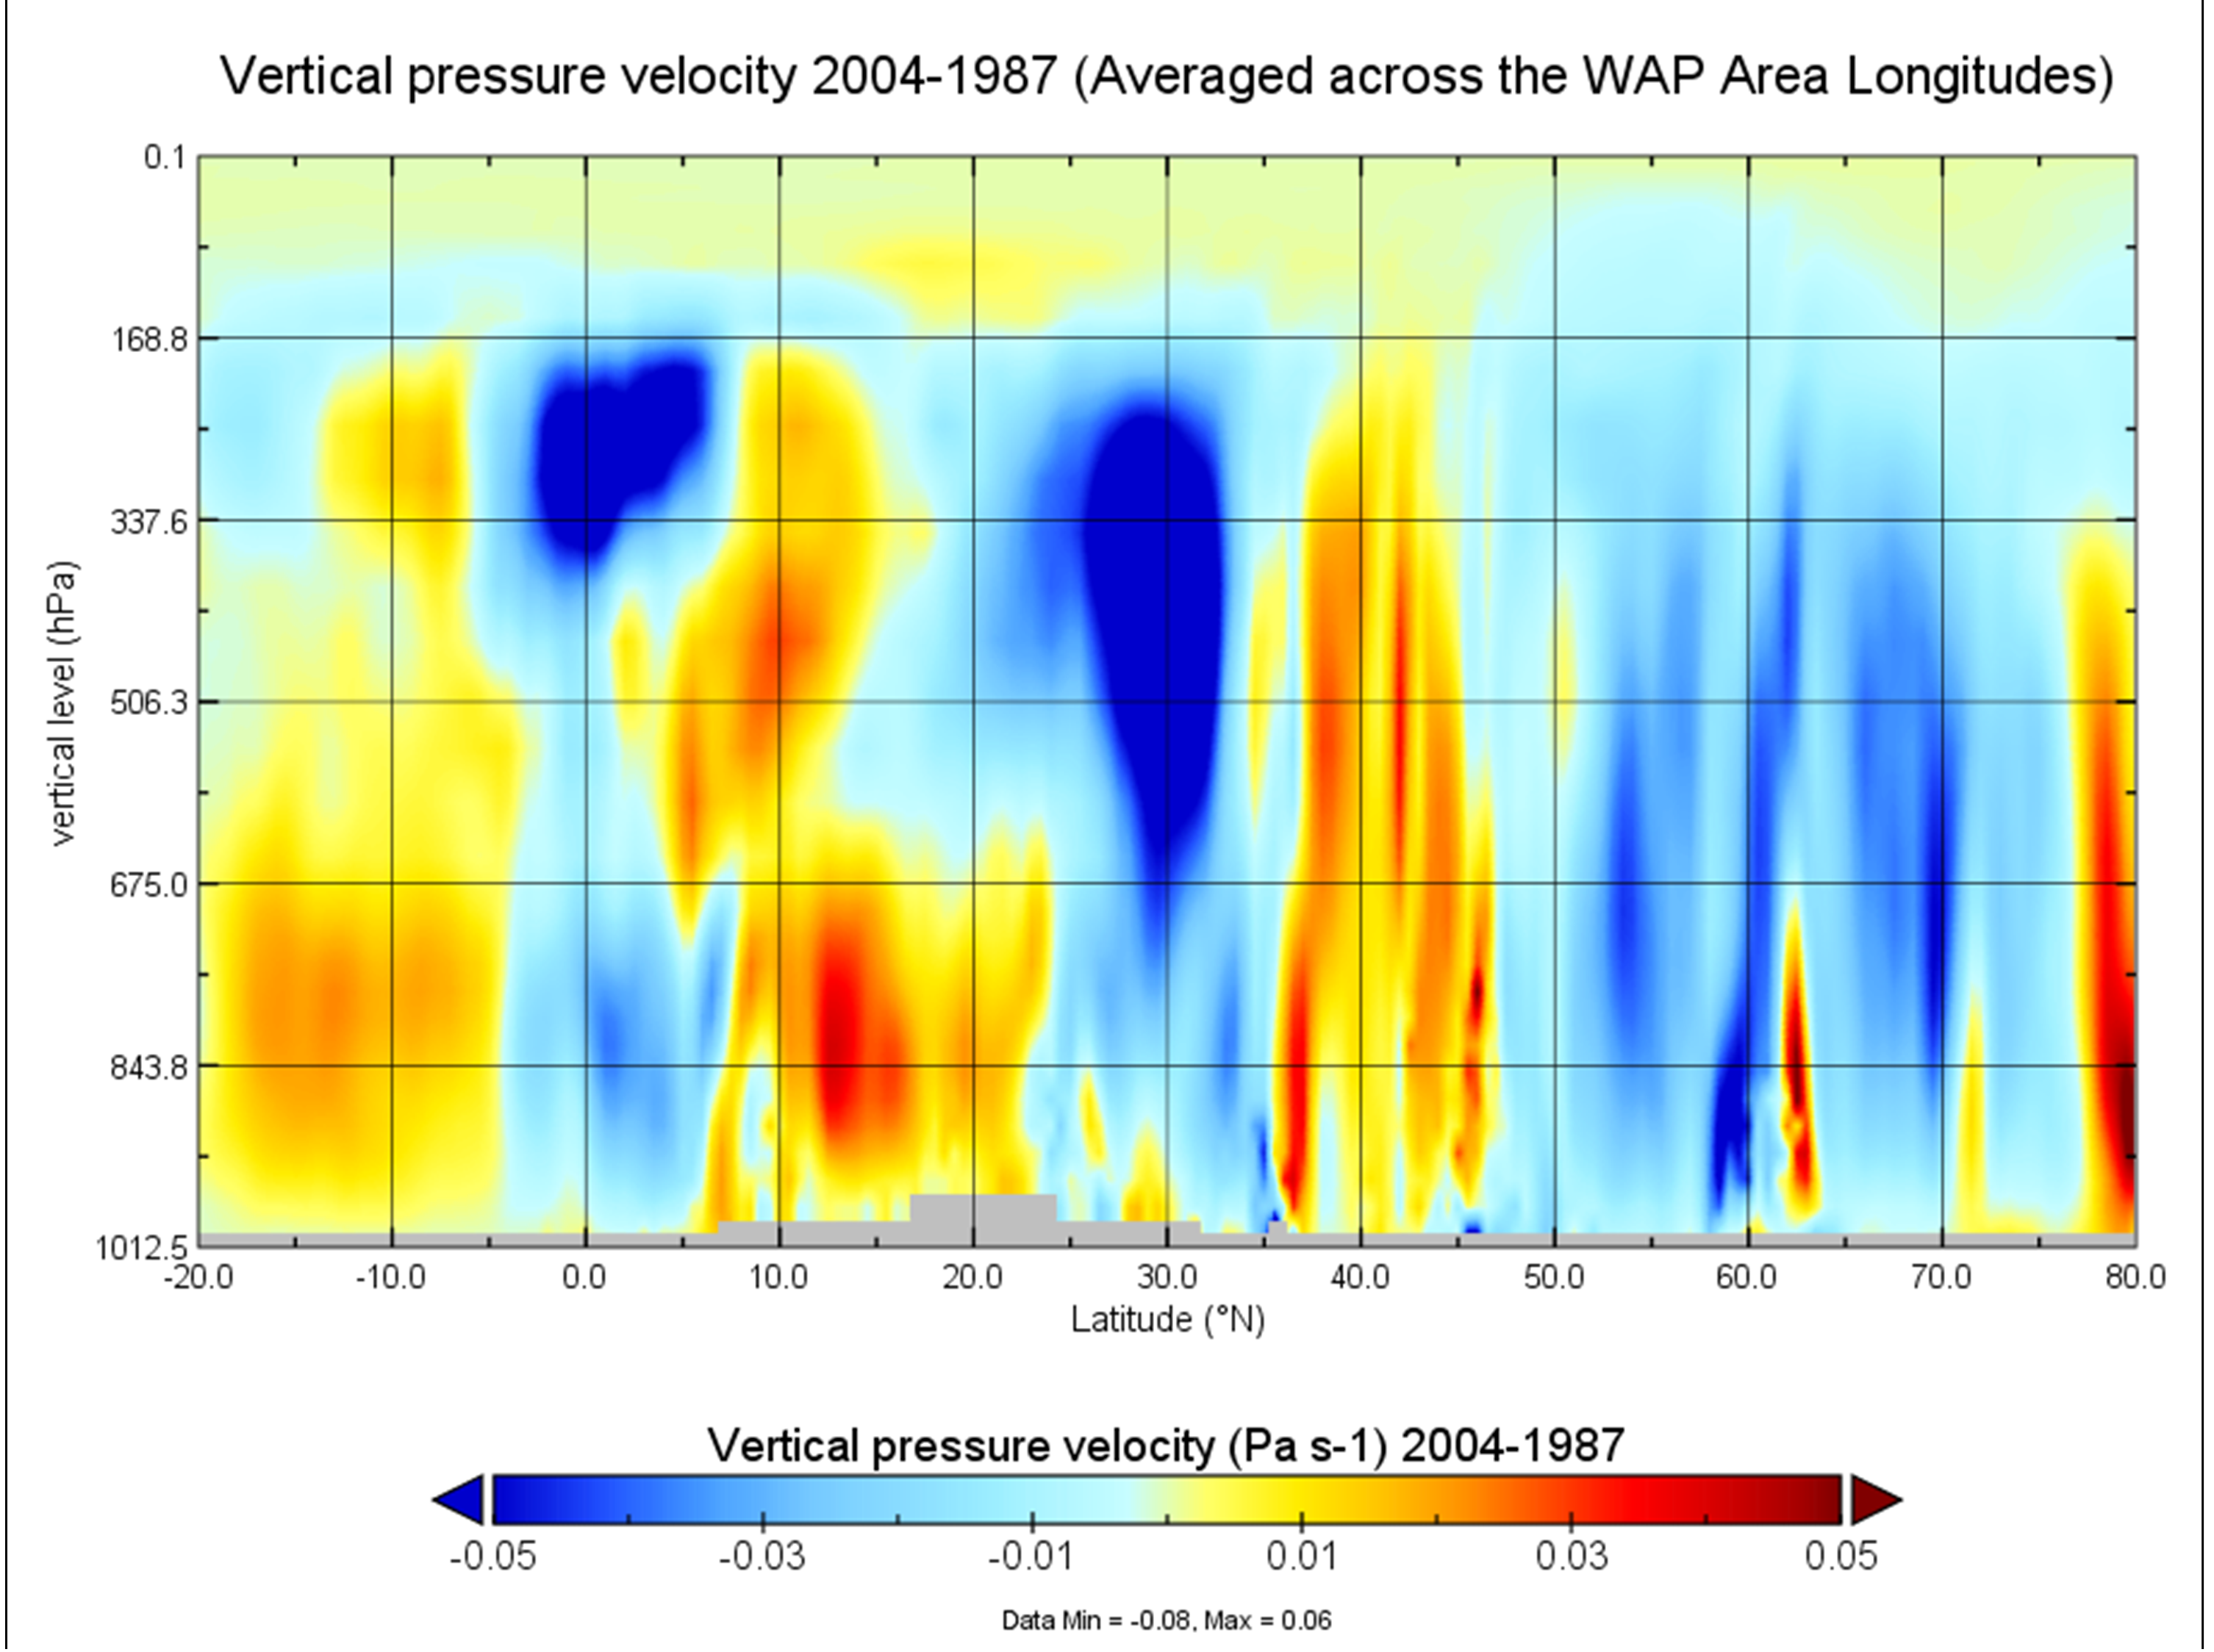


**Figure A11.** MERRA-2 JFM Omega 2004 minus 1987.


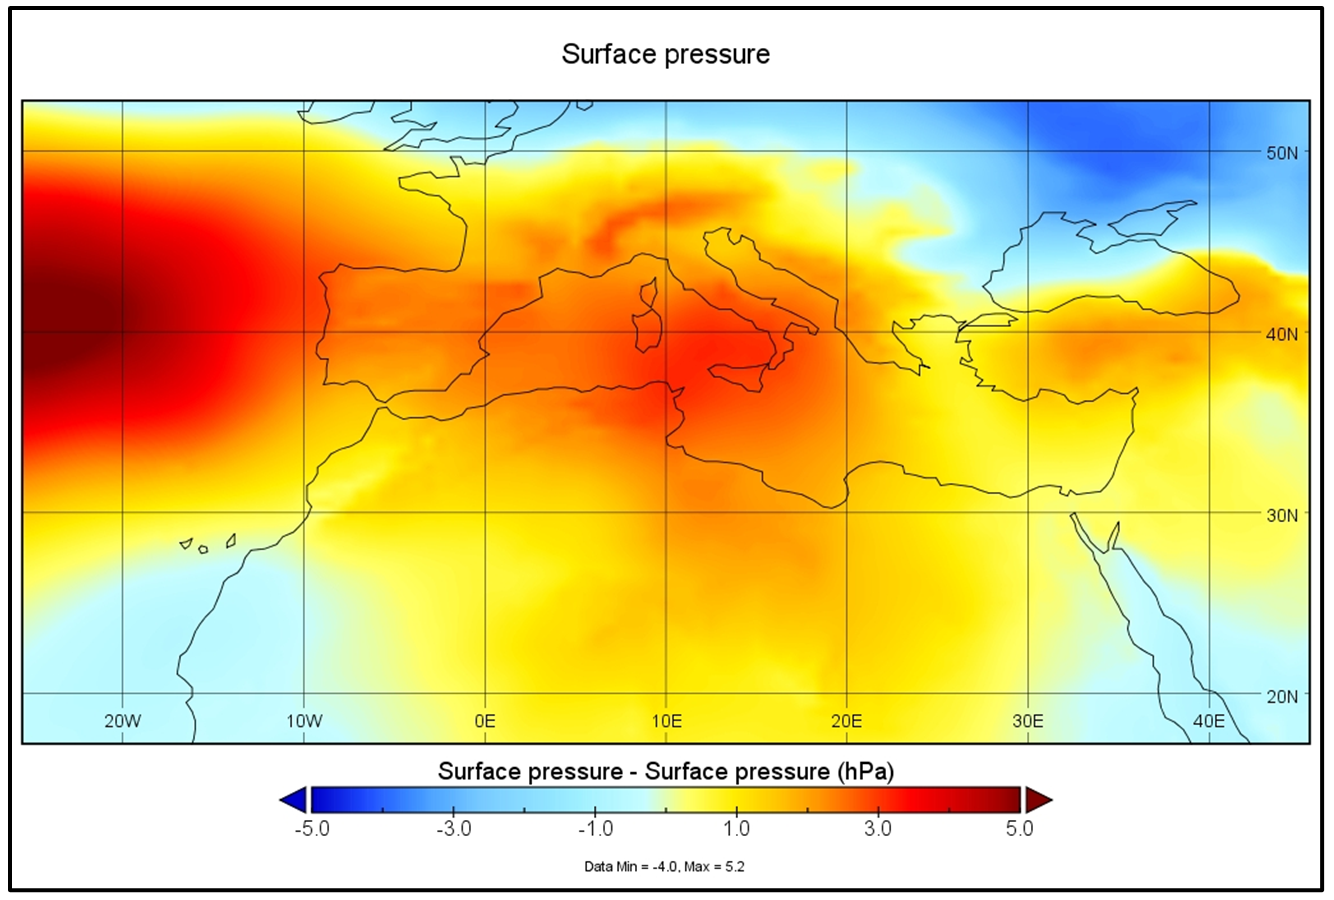


**Figure A12**. MERRA-2 JFM Surface Pressure 2004 minus1987


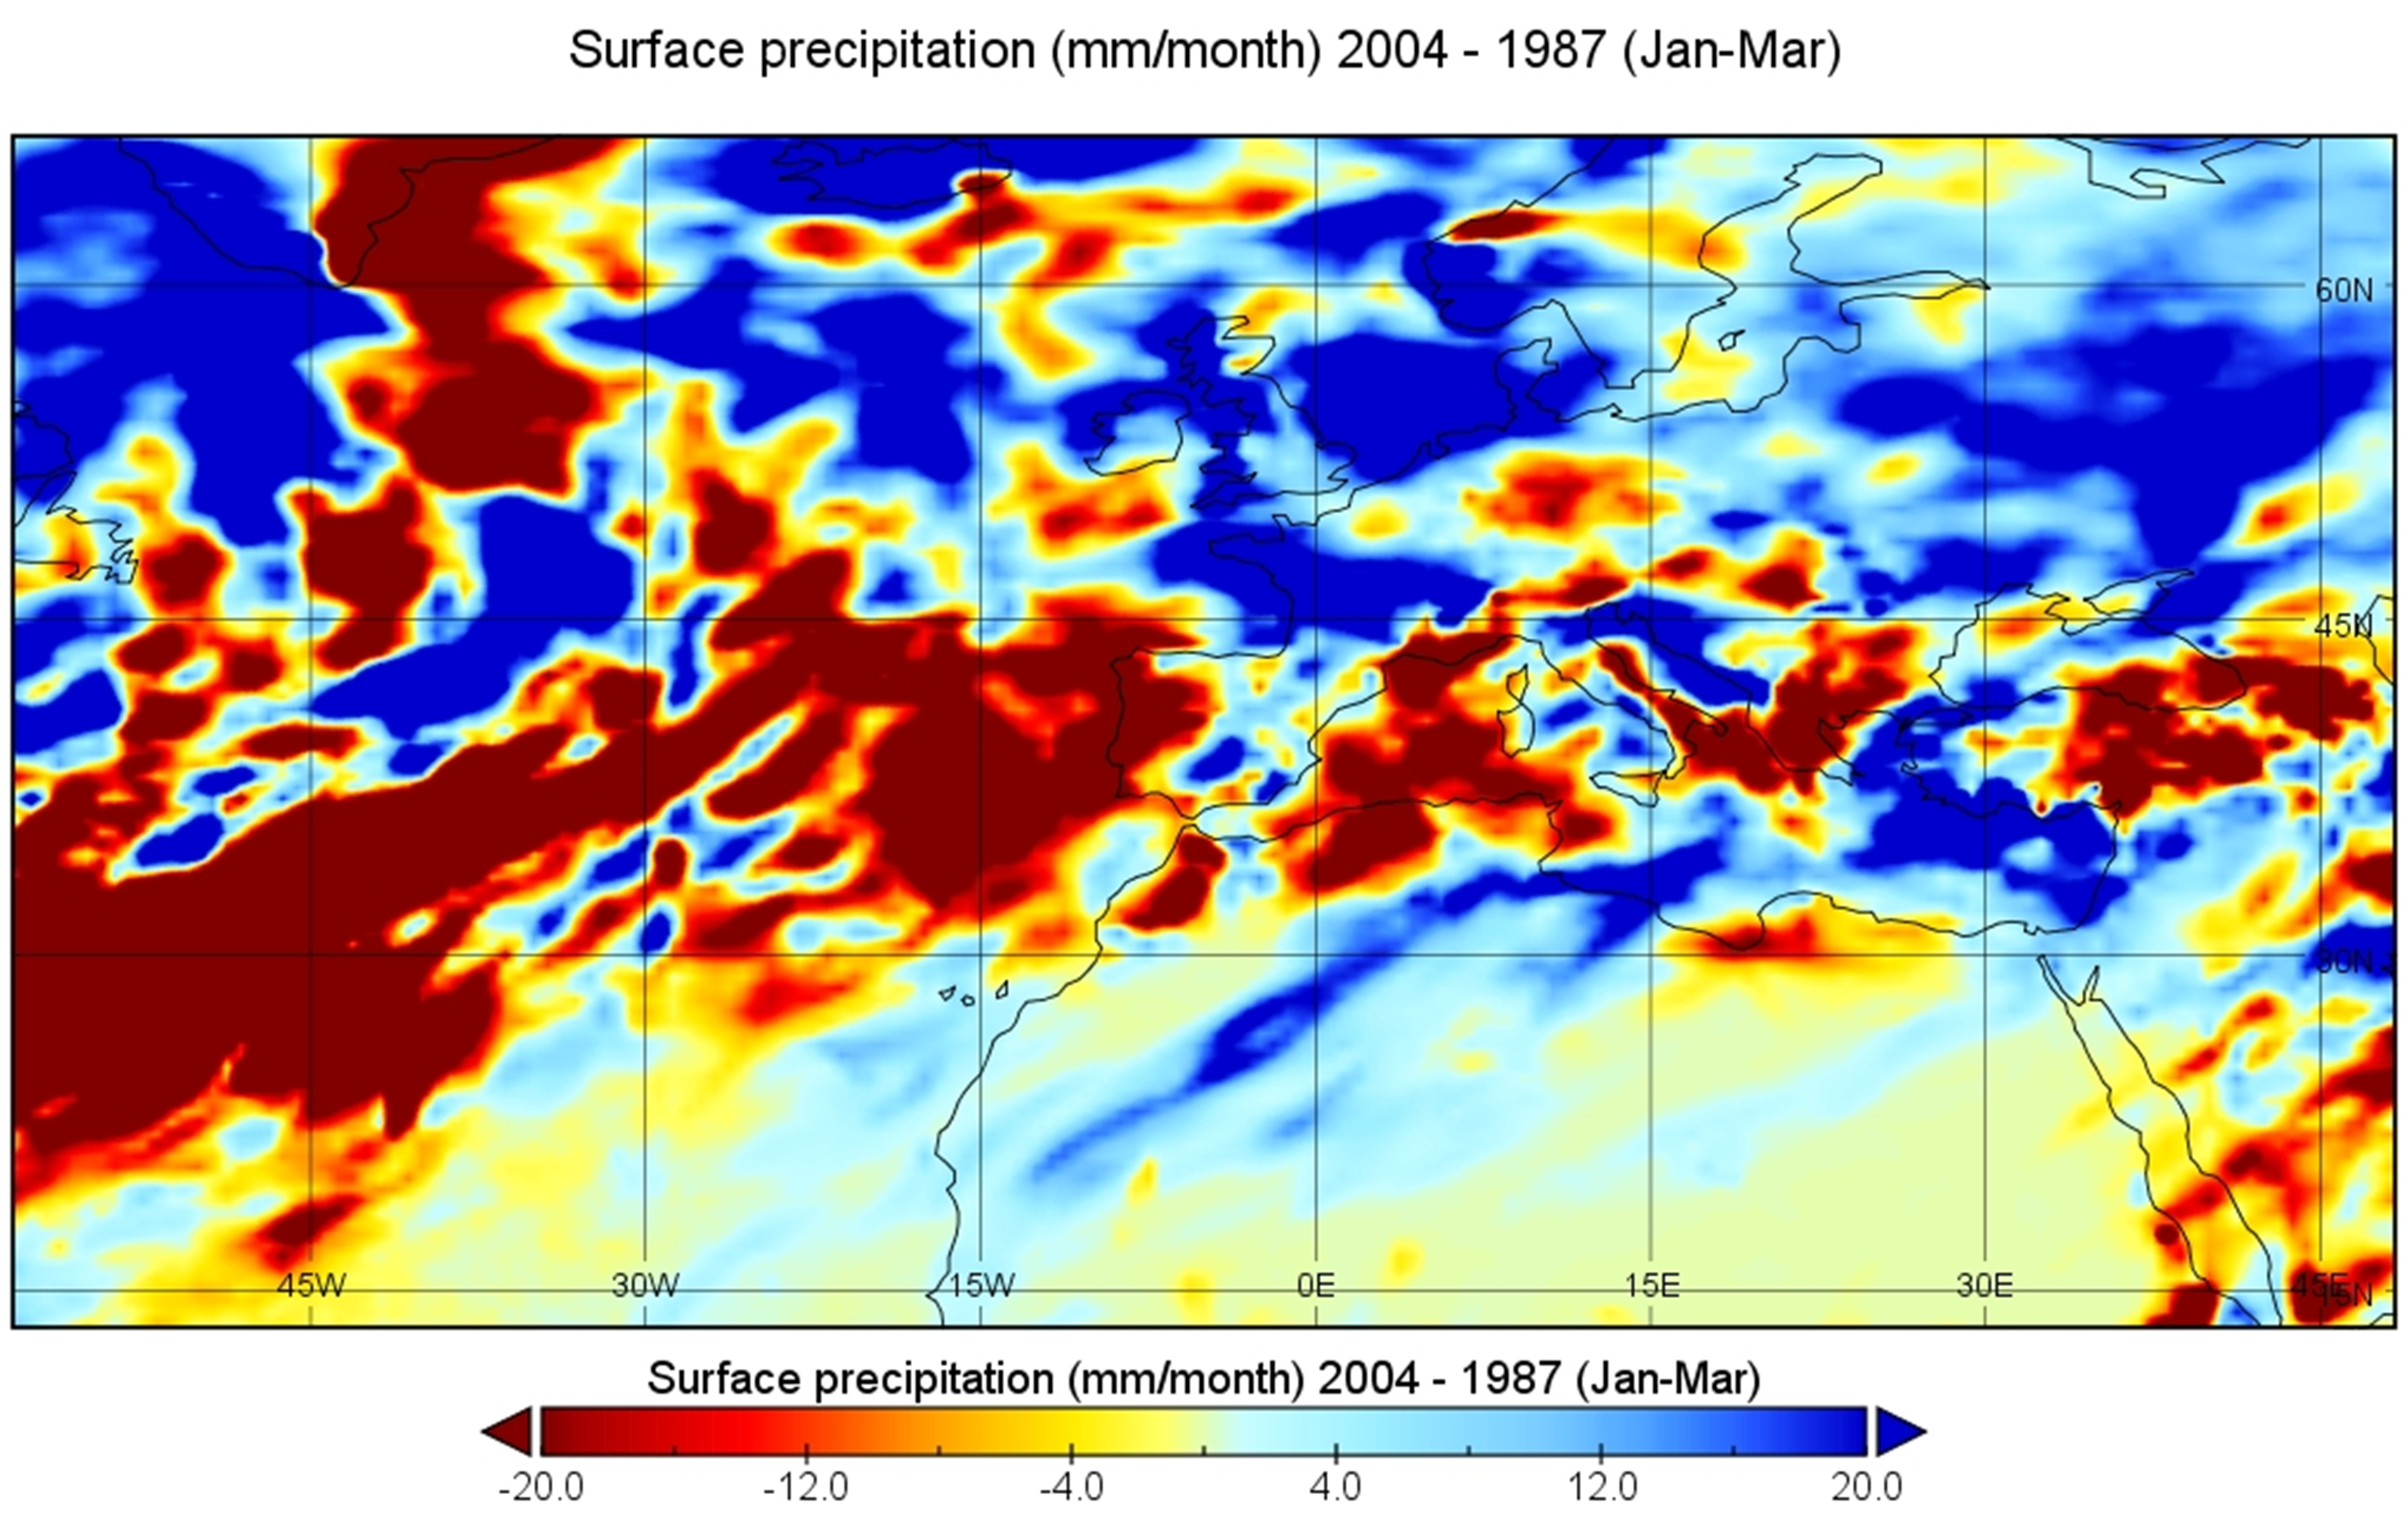


**Figure A13**. MERRA-2 JFM Precipitation 2004 minus1987


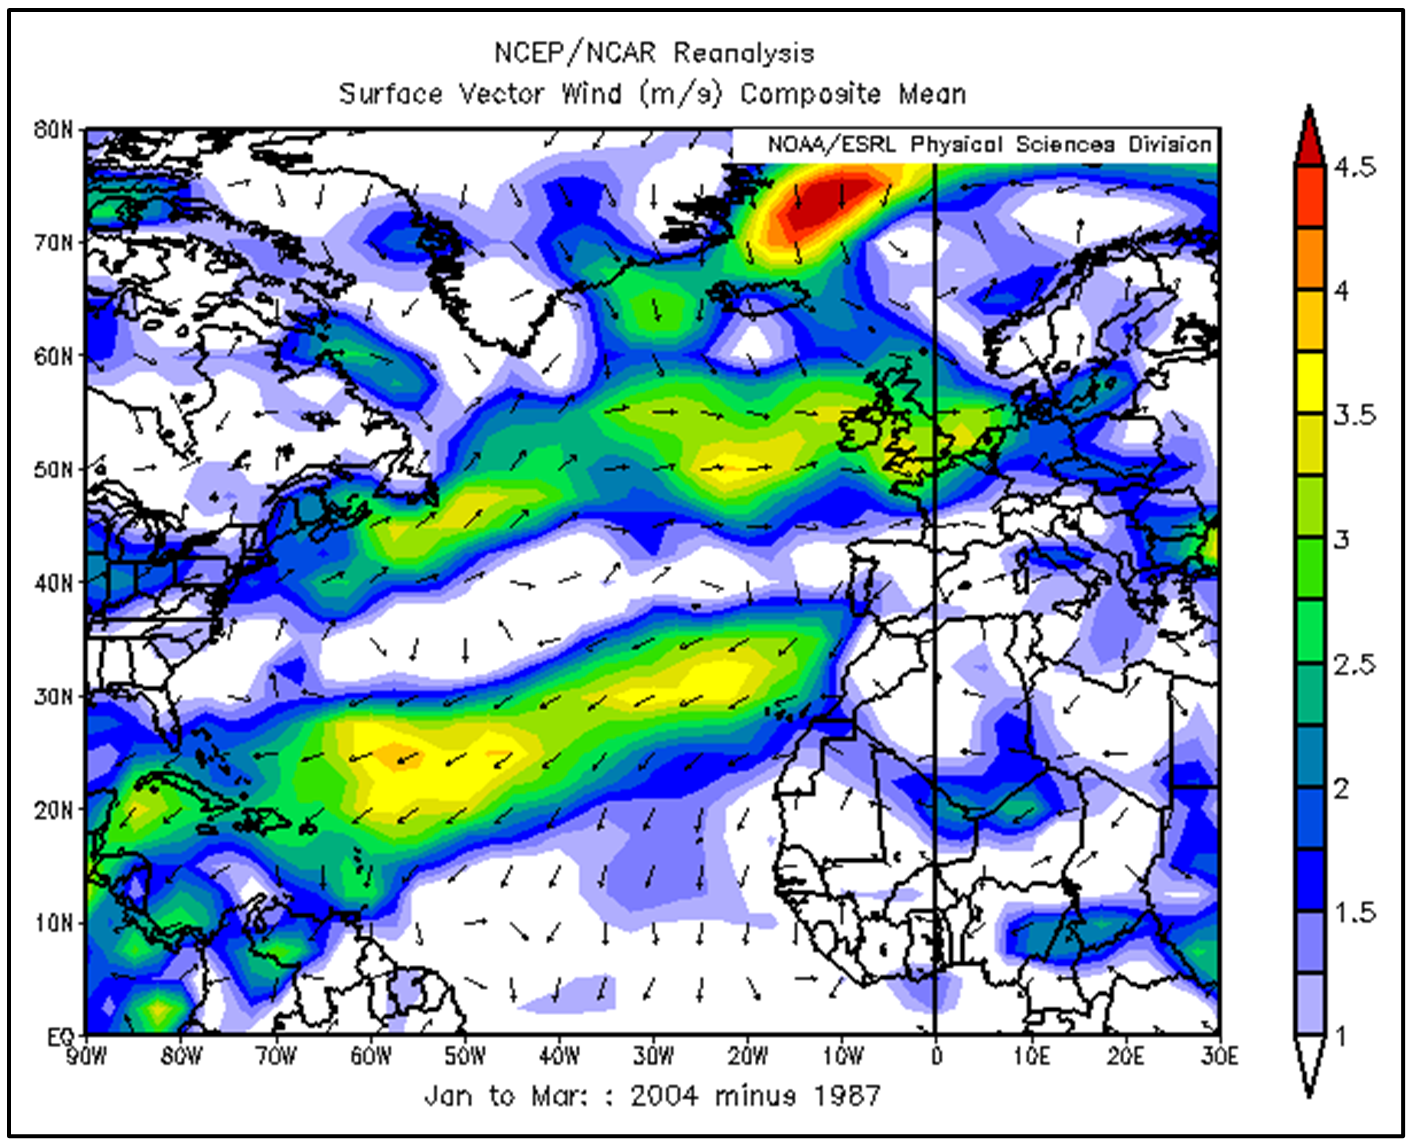


**Figure A14**. NCEP/NCAR JFM Surface Vector Wind 2004 minus1987


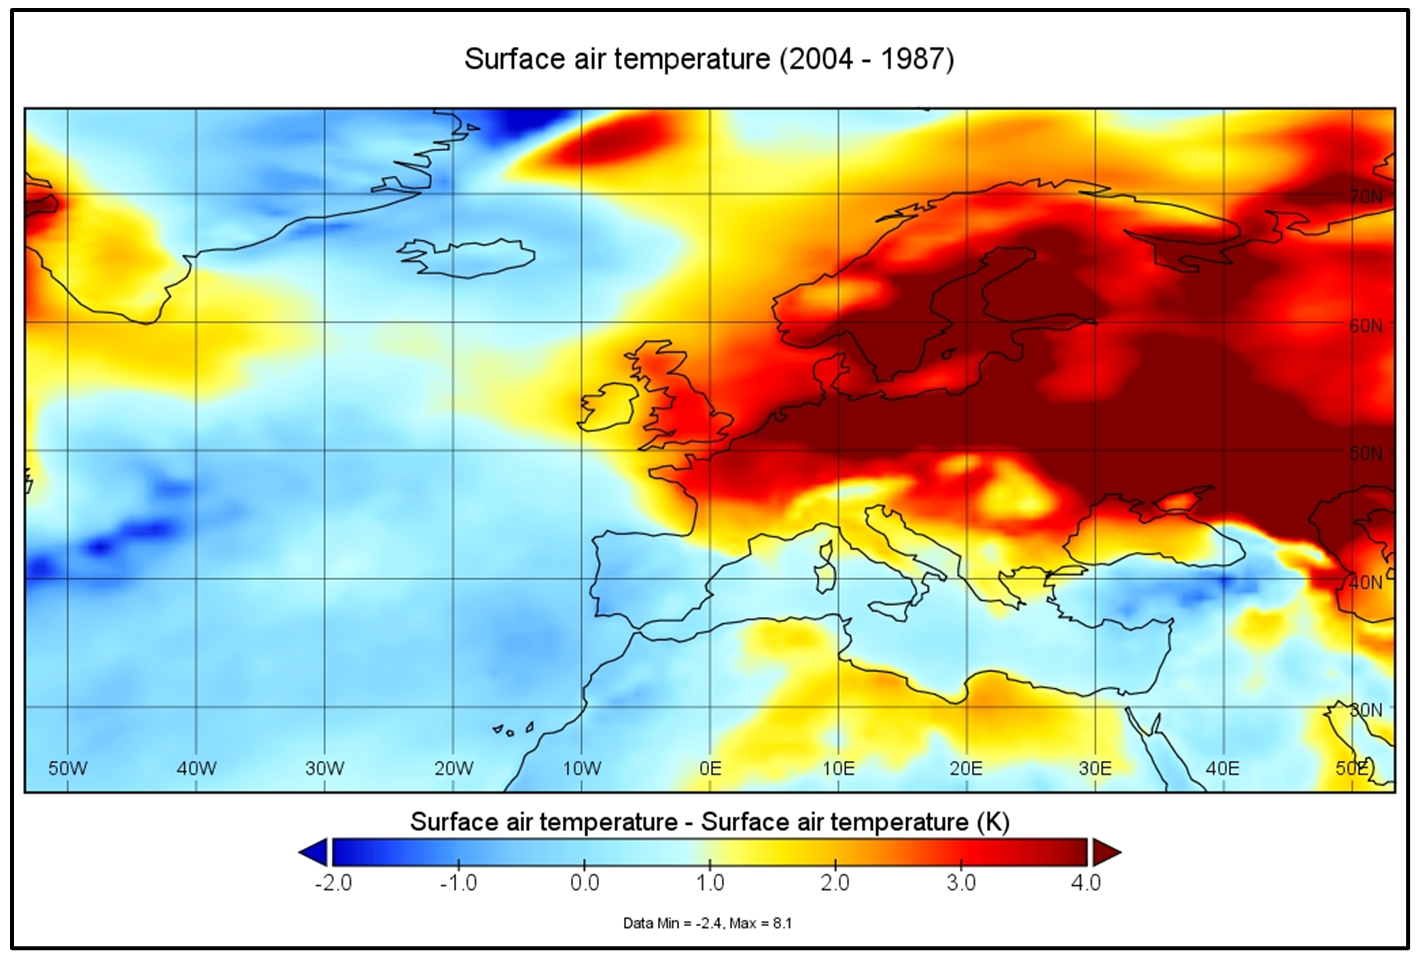


**Figure A15**. MERRRA-2 JFM Surface Temperature 2004 minus 1987

1. APPENDIX F: CORRELATION MATRIX FOR LME AND MERRA-2

**Table A2**. Correlation matrix for LME and MERRA-2 WAP Area AOD/AOD. The average excludes the self-correlations which return 1.00.

**Note**: There are some small correlations between MERRA-2 AOD and the LME runs however some are positive and some negative in Table A2 hence the 9 data sets are independent.

**References**

1. Knippertz, P.; Evans, M.J.; Field, P.R.; Fink, A.H.; Liousse, C.; Marsham, J.H. The possible role of local air pollution in climate change in West Africa. *Nature Clim. Change* **2015**, *5*, 815-822, doi:10.1038/nclimate2727.

2. Hansen, M.C.; Potapov, P.V.; Moore, R.; Hancher, M.; Turubanova, S.A.; Tyukavina, A.; Thau, D.; Stehman, S.V.; Goetz, S.J.; Loveland, T.R.; et al. High-Resolution Global Maps of 21st-Century Forest Cover Change. *Science* **2013**, *342*, 850-853, doi:10.1126/science.1244693.

3. Ginoux, P.; Garbuzov, D.; Hsu, N.C. Identification of anthropogenic and natural dust sources using Moderate Resolution Imaging Spectroradiometer (MODIS) Deep Blue level 2 data. *Journal of Geophysical Research: Atmospheres* **2010**, *115*, doi:10.1029/2009jd012398.

4. Ichoku, C.; Ellison, L.T.; Willmot, K.E.; Matsui, T.; Dezfuli, A.K.; Gatebe, C.K.; Wang, J.; Wilcox, E.M.; Lee, J.; Adegoke, J.; et al. Biomass burning, land-cover change, and the hydrological cycle in Northern sub-Saharan Africa. *Environmental Research Letters* **2016**, *11*, 095005, doi:10.1088/1748-9326/11/9/095005.

5. Andela, N.; van der Werf, G.R. Recent trends in African fires driven by cropland expansion and El Niño to La Niña transition. *Nature Climate Change* **2014**, *4*, 791-795, doi:10.1038/nclimate2313.

6. Fawole, O.G.; Cai, X.; Levine, J.G.; Pinker, R.T.; MacKenzie, A.R. Detection of a gas flaring signature in the AERONET optical properties of aerosols at a tropical station in West Africa. *Journal of Geophysical Research: Atmospheres* **2016**, *121*, 14,513-514,524, doi:<https://doi.org/10.1002/2016JD025584>.

7. Scholes, R.J.; Archibald, S.; Maltitz, G.P.V. Emissions from fire in Sub-Saharan Africa: the magnitude of sources, their variability and uncertainty. *Global Environmental Research* **2011**, *15*, 53-63.

8. Venzke, E. Volcanoes of the World. v. 4.9.1 (17 Sep 2020) <http://dx.doi.org/10.5479/si.GVP.VOTW4-2013>. **2013**, doi: <http://dx.doi.org/10.5479/si.GVP.VOTW4-2013>.

9. Solomon, S.; Qin, D.; Manning, M.; Alley, R.B.; Berntsen, T.; Bindoff, N.L.; Chen, Z.; Chidthaisong, A.; Gregory, J.M.; Hegerl, G.C.; et al. Technical Summary. In: Climate Change 2007: The Physical Science Basis. Contribution of Working Group I to the Fourth Assessment Report of the Intergovernmental Panel on Climate Change [Solomon, S., D. Qin, M. Manning, Z. Chen, M. Marquis, K.B. Averyt, M. Tignor and H.L. Miller (eds.)]. Cambridge University Press, Cambridge, United Kingdom and New York, NY, USA. **2007**.

10. Forster, P.; Ramaswamy, V.; Artaxo, P.; Berntsen, T.; Betts, R.; Fahey, D.W.; Haywood, J.; Lean, J.; Lowe, D.C.; Myhre, G.; et al. Changes in Atmospheric Constituents and in Radiative Forcing. In: Climate Change 2007: The Physical Science Basis. Contribution of Working Group I to the Fourth Assessment Report of the Intergovernmental Panel on Climate Change [Solomon, S., D. Qin, M. Manning, Z. Chen, M. Marquis, K.B. Averyt, M.Tignor and H.L. Miller (eds.)] Cambridge University Press, Cambridge, United Kingdom and New York, NY, USA. **2007**.

11. Novakov, T.; Ramanathan, V.; Hansen, J.E.; Kirchstetter, T.W.; Sato, M.; Sinton, J.E.; Sathaye, J.A. Large historical changes of fossil-fuel black carbon aerosols. *Geophysical Research Letters* **2003**, *30*, 1324, doi:10.1029/2002GL016345.

12. Kirchstetter, T.W. Evidence that the spectral dependence of light absorption by aerosols is affected by organic carbon. *Journal of Geophysical Research* **2004**, *109*, doi:10.1029/2004jd004999.

13. Menon, S.; Hansen, J.; Nazarenko, L.; Luo, Y. Climate Effects of Black Carbon Aerosols in China and India. *Science* **2002**, *297*, 2250-2253, doi:10.1126/science.1075159.

14. Wang, C. A modeling study on the climate impacts of black carbon aerosols. *Journal of Geophysical Research: Atmospheres* **2004**, *109*, D03106, doi:10.1029/2003JD004084.

15. Su, W.; Loeb, N.G.; Schuster, G.L.; Chin, M.; Rose, F.G. Global all-sky shortwave direct radiative forcing of anthropogenic aerosols from combined satellite observations and GOCART simulations. *Journal of Geophysical Research: Atmospheres* **2013**, *118*, 655-669, doi:<https://doi.org/10.1029/2012JD018294>.

16. Hegerl, G.C.; Zwiers, F.W.; Braconnot, P.; Gillett, N.P.; Luo, Y.; Marengo Orsini, J.A.; Nicholls, N.; Penner, J.E.; Stott, P.A. Understanding and Attributing Climate Change. In: Climate Change 2007: The Physical Science Basis. Contribution of Working Group I to the Fourth Assessment Report of the Intergovernmental Panel on Climate Change [Solomon, S., D. Qin, M. Manning, Z. Chen, M. Marquis, K.B. Averyt, M. Tignor and H.L. Miller (eds.)]. Cambridge University Press, Cambridge, United Kingdom and New York, NY, USA. **2007**.

17. Levy II, H.; Shindell, D.T.; Gilliland, A.; Schwarzkopf, M.D.; Horowitz, L.W. Executive Summary in Climate Projections Based on Emissions Scenarios for Long-Lived and Short-Lived Radiatively Active Gases and Aerosols. H. Levy II, D.T. Shindell, A. Gilliland, M.D. Schwarzkopf, L.W. Horowitz, (eds.). A Report by the U.S. Climate Change Science Program and the Subcommittee on Global Change Research, Washington, D.C. **2008**.

18. Remer, L.A.; Chin, M.; DeCola, P.; Feingold, G.; Halthore, R.; Kahn, R.A.; Quinn, P.K.; Rind, D.; Schwartz, S.E.; Streets, D.G.; et al. Executive Summary, in Atmospheric Aerosol Properties and Climate Impacts, A Report by the U.S. Climate Change Science Program and the Subcommittee on Global Change Research [Mian Chin, Ralph A. Kahn, and Stephen E. Schwartz (eds.)]. National Aeronautics and Space Administration, Washington, D.C., USA. **2009**.

19. Booth, B.B.; Dunstone, N.J.; Halloran, P.R.; Andrews, T.; Bellouin, N. Aerosols implicated as a prime driver of twentieth-century North Atlantic climate variability. *Nature* **2012**, *484*, 228-232, doi:10.1038/nature10946.

20. Allen, R.J.; Sherwood, S.C.; Norris, J.R.; Zender, C.S. Recent Northern Hemisphere tropical expansion primarily driven by black carbon and tropospheric ozone. *Nature* **2012**, *485*, 350-354, doi:10.1038/nature11097.

21. Zhang, R.; Delworth, T.L.; Sutton, R.; Hodson, D.L.R.; Dixon, K.W.; Held, I.M.; Kushnir, Y.; Marshall, J.; Ming, Y.; Msadek, R.; et al. Have Aerosols Caused the Observed Atlantic Multidecadal Variability? *Journal of the Atmospheric Sciences* **2013**, *70*, 1135-1144, doi:doi:10.1175/JAS-D-12-0331.1.

22. Ott, L.; Duncan, B.; Pawson, S.; Colarco, P.; Chin, M.; Randles, C.; Diehl, T.; Nielsen, E. Influence of the 2006 Indonesian biomass burning aerosols on tropical dynamics studied with the GEOS-5 AGCM. *Journal of Geophysical Research: Atmospheres* **2010**, *115*, D14121, doi:10.1029/2009JD013181.

23. Lamarque, J.F.; Bond, T.C.; Eyring, V.; Granier, C.; Heil, A.; Klimont, Z.; Lee, D.; Liousse, C.; Mieville, A.; Owen, B.; et al. Historical (1850–2000) gridded anthropogenic and biomass burning emissions of reactive gases and aerosols: methodology and application. *Atmospheric Chemistry and Physics* **2010**, *10*, 7017-7039, doi:10.5194/acp-10-7017-2010.
